# Supplementary material
Source: PubMed Central journal article supplement (PMC8655668)
Supplement: jama-e2122002-s002.pdf [file jama-e2122002-s002.pdf]

## Supplementary Online Content

Driver BE, Semler MW, Self WH, et al; for the BOUGIE Investigators and the Pragmatic Critical Care Research Group. Effect of use of a bougie vs endotracheal tube with stylet on successful intubation on the first attempt among critically ill patients undergoing tracheal intubation: a randomized clinical trial. *JAMA*. doi:10.1001/jama.2021.22002

|                                                                                                    |    |
|----------------------------------------------------------------------------------------------------|----|
| List of the BOUGIE Investigators                                                                   | 3  |
| List of Pragmatic Critical Care Research Group Members                                             | 4  |
| Supplemental methods                                                                               | 5  |
| A. IRB approval and waiver of informed consent                                                     | 5  |
| B. Characteristics of the study intensive care units                                               | 6  |
| C. Characteristics of the study emergency departments                                              | 8  |
| D. Inclusion and exclusion criteria                                                                | 10 |
| E. Exploratory outcomes                                                                            | 11 |
| F. Modeling of the primary outcome                                                                 | 13 |
| G. Effect modification (Subgroup analyses)                                                         | 14 |
| H. Sensitivity analyses of the primary outcome                                                     | 15 |
| I. Handling of missing data                                                                        | 16 |
| J. Results of the interim analysis                                                                 | 17 |
| Supplemental Figures                                                                               | 18 |
| eFigure 1. Cumulative proportion of patients successfully intubated.                               | 18 |
| eFigure 2. Calibration plot for the first model used for adjusted analysis of the primary outcome  | 19 |
| eFigure 3. Calibration plot for the second model used for adjusted analysis of the primary outcome | 20 |
| eFigure 4. Successful intubation on the first attempt by prior operator experience                 | 21 |
| eFigure 5. Successful intubation on the first attempt by site.                                     | 22 |
| eFigure 6. Cumulative proportion of patients successfully intubated on the first attempt.          | 23 |
| Supplementary Tables                                                                               | 24 |
| eTable 1. Chronic comorbidities.                                                                   | 24 |
| eTable 2. Active medical conditions at the time of intubation.                                     | 25 |
| eTable 3. Primary indication for tracheal intubation.                                              | 26 |
| eTable 4. Difficult airway characteristics.                                                        | 27 |
| eTable 5. Operator characteristics.                                                                | 29 |
| eTable 6. Characteristics of the intubation procedure with marginal estimates                      | 30 |

|                                                                                              |    |
|----------------------------------------------------------------------------------------------|----|
| eTable 7. Additional characteristics of the intubation procedure.                            | 31 |
| eTable 8. Patients who did not receive the assigned device on the first laryngoscope attempt | 33 |
| eTable 9. Multivariable models for successful intubation on the first attempt.               | 34 |
| eTable 10. Pre-specified sensitivity analyses.                                               | 35 |
| eTable 11. Post-hoc sensitivity analyses.                                                    | 36 |
| eTable 12: Additional Subgroup Analyses of the Primary Outcome                               | 37 |
| eTable 13. Additional procedural outcomes.                                                   | 38 |
| eTable 14. Adverse events.                                                                   | 39 |
| eTable 15. Management when intubation did not occur on the first attempt                     | 40 |
| eReferences                                                                                  | 41 |

This supplementary material has been provided by the authors to give readers additional information about their work.

## List of the BOUGIE Investigators

Vanderbilt University Medical Center— Matthew W. Semler, MD, MSc\*\*\*; Wesley H. Self, MD, MPH\*\*\*; Christopher G Hughes, MD, MS\*\*\*; Kevin High, RN, MPH\*\*\*; Janna S. Landsperger, MSN\*\*\*; Karen Jackson, MD\*\*\*; Bret D. Alvis, MD\*\*\*; Li Wang, MS\*\*\*; Christopher J. Lindsell PhD\*\*\*; Todd W. Rice, MD, MSc\*\*\*; Jonathan D. Casey\*\*\*, MD, MSc\*\*\*; Christopher S. Gray, RN\*\*; Andrea Fletcher, RN\*\*; Sally Dye, RN\*\*; Aaron J. Lacy, MD\*; Bradley Lloyd, RRT-ACCS\*. University of Colorado School of Medicine— Adit A Ginde, MD, MPH\*\*\*; Michelle P Howell, RN, BSN\*\*\*; Anthony T Defebio, RRT-ACCS\*; Dvonne A. Duran, RRT\*; Elizabeth A Farmer, BS, RRT\*; Jennifer Friedel, BS\*; Robert Mitchell, RRT\*; Feysel Mohamed, RRT-ACCS\*; Karina M Nava, RRT-ACCS\*; Justin N Oeth, MSN\*; Angela Otoo, RRT\*; Cori Withers\*.

University of Alabama at Birmingham Medical Center— Sheetal Gandotra, MD\*\*\*; David B Page, MD\*\*\*; Sarah W. Robison, MD\*\*\*; Micah R Whitson, MD\*\*\*; Derek W. Russell, MD\*\*\*; Swati Gulati, MBBS, MS\*\*; Michael C. Kurz, MD, MS\*\*; Anna Altz-Stamm, RN\*; Cristina Bardita, MD\*; Mary Clay Boone, RN\*; Joe W. Chiles III, MD\*; Kristina Collins, RN\*; Stephanie C. Demasi, MD\*; Abby Drescher, RN\*; Kevin G. Dsouza, MD\*; Janna Dunn, RN\*; Stacy Ejem, MD\*; Kristy K. Ford, MD\*; Josh Gautney, MD\*; Laura E. Goyack, MD\*; Nicole Harris, RN\*; Savannah Herder, RN\*; Tamer Hudali, MD\*; Rutwij Joshi, MBBS\*; Daniel Kelmenson, MD\*; Trevor S. Mattox, MD\*; Anne Merrill Mason, RN\*; Scott R. Merriman, MD\*; Takudzwa Mkorombindo, MD\*; Megan Moore, RN\*; Jada Nowak, RN\*; Kate O'Connor, DO\*; Sheylan D. Patel, MD\*; G. Bruno Pereira, MD\*; Lisa Sarratt, RN\*; Tabitha Stewart, RN\*; William S. Stigler, MD\*; Kadambari Vijaykumar, MBBS\*; R. Chad Wade, MD\*; Gina White, RN\*.

Denver Health Medical Center— Stacy A Trent, MD, MPH\*\*\*; Carol L. Lyle, MPH, PA-C\*\*; Stephanie Gravitz, MPH\*\*; Alicia K. Cupelo, MSW\*.

Wake Forest School of Medicine— Lane M Smith, MD, PhD\*\*\*; John P Gaillard, MD\*\*\*; Kevin W. Gibbs, MD\*\*\*; Erika L.W. Rice, DO\*\*; Nathaniel D. Westphal, MD\*\*; Kristy K. Ford, MD\*; Trevor S. Mattox, MD\*.

Ochsner Health System New Orleans— Derek J Vonderhaar, MD\*\*\*.

University of Washington Harborview Medical Center— Aaron M. Joffe, DO\*\*\*; Steven H Mitchell, MD\*\*\*; Andrew J Latimer, MD\*\*\*; Christopher Barnes\*\*\*; Itay Bentov, MD, PhD\*\*; Andrew M. Walters\*\*, Takato Watase, MD MBA\*; Layla Anderson, BA\*.

Lincoln Medical Center— Jason R West, MD\*\*\*.

University of Iowa Hospitals and Clinics— Kevin Doerschug, MD\*\*\*; Vikas Koppurapu, MD\*\*\*.

Louisiana State University School of Medicine—David R Janz, MD, MSc\*\*\*.

Hennepin County Medical Center—Matthew E Prekker, MD MPH\*\*\*; Brian E Driver, MD\*\*\*; Jamie Stang, BS\*\*; Paige DeVries, BS\*\*; Ellen Maruggi, BS\*\*.

\*\*\*Denotes an author listed on the byline.

\*\*Denotes an author not listed on the byline due to space.

\*Denotes a collaborator.

## List of Pragmatic Critical Care Research Group Members

**Executive Committee:** Matthew W. Semler, MD, MSc (Chair); Denver Health Medical Center — Stacy A Trent, MD, MPH; Hennepin County Medical Center — Brian E. Driver, MD; Matthew E. Prekker, MD, MPH; Louisiana State University School of Medicine — David R. Janz, MD, MSc; University of Alabama at Birmingham Medical Center — Sheetal Gandotra, MD; Derek W. Russell, MD; University of Colorado School of Medicine — Adit A. Ginde, MD, MPH; Vanderbilt University Medical Center — Jonathan D. Casey, MD, MSc; Todd W. Rice, MD, MSc; Wesley H. Self, MD, MPH; Matthew W. Semler, MD, MSc; Wake Forest School of Medicine — Kevin W. Gibbs, MD.

**Coordinating Center:** Jonathan D. Casey, MD, MSc (Director); Christopher J. Lindsell PhD; Todd W. Rice, MD, MSc; Wesley H. Self, MD, MPH; Matthew W. Semler, MD, MSc; Li Wang, MS – all at Vanderbilt University Medical Center.

**Steering Committee:** Baylor Scott & White Medical Center — Shekhar Ghamande, MD; Denver Health Medical Center — Stacy A. Trent, MD, MPH; Hennepin County Medical Center — Brian E. Driver, MD; Matthew E. Prekker, MD MPH; Lahey Hospital and Medical Center — James M. Dargin, MD; Susan Stempek, PA-C; Lincoln Medical Center — Jason R. West, MD; Louisiana State University School of Medicine — David R. Janz, MD, MSc; Ochsner Health System New Orleans — Derek J. Vonderhaar, MD; Oregon Health and Science University School of Medicine — Akram Khan, MD; University of Alabama at Birmingham Medical Center — Sheetal Gandotra, MD; David B. Page, MD; Micah R. Whitson, MD; Derek W. Russell, MD; University of Colorado School of Medicine — Adit A. Ginde, MD, MPH; University of Iowa Hospitals and Clinics — Kevin Doerschug, MD; Vikas Koppurapu, MD; University of Mississippi Medical Center — Joseph M. Brewer, DO, MS; University of Washington Harborview Medical Center — Steven H. Mitchell, MD; Andrew J. Latimer, MD; Christopher Barnes; Itay Bentov, MD, PhD; Vanderbilt University Medical Center — Matthew W. Semler, MD, MSc; Wesley H. Self, MD, MPH; Todd W. Rice, MD, MSc; Jonathan D. Casey, MD, MSc; Aaron J. Lacy, MD; Wake Forest School of Medicine — Lane M. Smith, MD, PhD; John P. Gaillard, MD; Kevin W. Gibbs, MD.

## **Supplemental methods**

### **A. IRB approval and waiver of informed consent**

Critically ill adults undergoing tracheal intubation in the emergency department (ED) or intensive care unit (ICU) are at significant risk for morbidity and mortality from their critical illness. In the United States, most patients undergoing emergency tracheal intubation in routine clinical care receive either a bougie or an endotracheal tube with stylet on the first attempt, thus experiencing any benefits or risks of these two approaches as a part of clinical care, outside the context of research. The only patients eligible for the BOUGIE trial were patients for whom their treating clinician considered use of either a bougie or an endotracheal tube with stylet to be safe and reasonable approaches to tracheal intubation of the patient (otherwise the patient was excluded). Thus, for patients who were undergoing tracheal intubation with either a bougie or an endotracheal tube and stylet as a part of clinical care, and whose treating clinician felt that either approach was a safe and reasonable approach for their care, making the decision between the two approaches using randomization (by trial group assignment) was felt to pose no more than minimal additional risk, compared to the risks the patient would experience in clinical care without participation in the research.

Additionally, obtaining informed consent for participation in the study would be impracticable. In addition to the time-sensitive nature of tracheal intubation in the ED or ICU, critically ill patients requiring intubation are frequently unconscious or delirious due to their critical illness. Further, legally authorized representatives are commonly unavailable during the brief period between the decision to intubate and the completion of the procedure, and the need for emergency tracheal intubation and distress of the patient or LAR from the patient's critical illness precludes a meaningful informed consent process even when an LAR is present. Delaying emergency tracheal intubation for a critically ill adults to attempt a meaningful informed consent process would be unsafe, impracticable, and unethical. Despite the availability of a formal informed consent document for the procedure itself, time allows discussion of risks and benefits in less than 10% of airway management events in the study settings.

Because the BOUGIE trial was considered to pose minimal incremental risk and obtaining informed consent was considered to be impracticable, the trial was conducted under a waiver of informed consent. This approach is consistent with previous randomized trials comparing the effectiveness of alternative approaches to tracheal intubation commonly used in current clinical care.<sup>1-8</sup> The trial was approved by the central Institutional Review Board (cIRB) at Vanderbilt University Medical Center (reference number 182123) and a local institutional review board at Lincoln Medical Center (reference number 19-024), with the remainder of site IRBs ceding review to the cIRB.

## B. Characteristics of the study intensive care units

| Characteristic                        | Vanderbilt MICU | Vanderbilt Neuro ICU | UAB MICU      | Ochsner MICU  | LSU MICU       | UW ICU        | Iowa MICU | HCMC MICU |
|---------------------------------------|-----------------|----------------------|---------------|---------------|----------------|---------------|-----------|-----------|
| Annual admissions                     | 2,940           | 2,800                | 2,000         | 3,500         | 2,600          | 6,900         | 2,800     | 900       |
| Number of beds                        | 35              | 23                   | 24            | 33            | 24             | 89            | 26        | 28        |
| Annual number of tracheal intubations | 200             | 200                  | 200           | 400           | 300            | 1000          | 250       | 160       |
| Personnel present at intubation       |                 |                      |               |               |                |               |           |           |
| Critical Care Attending               | Always          | Almost Always        | Almost Always | Always        | Almost Always  | Sometimes     | Sometimes | Sometimes |
| Critical Care Fellow                  | Always          | Almost Always        | Almost Always | Almost Always | Sometimes      | Sometimes     | Always    | Sometimes |
| Internal Medicine Resident            | Rarely          | Never                | Sometimes     | Rarely        | Rarely         | Never         | Never     | Never     |
| Emergency Medicine Attending          | Never           | Never                | Never         | Never         | Never          | Sometimes     | Never     | Sometimes |
| Emergency Medicine Fellow             | Never           | Never                | Never         | Never         | Never          | Sometimes     | Never     | Rarely    |
| Emergency Medicine Resident           | Never           | Never                | Never         | Never         | Never          | Sometimes     | Never     | Sometimes |
| Anesthesiology Attending              | Never           | Always               | Never         | Sometimes     | Never          | Almost Always | Rarely    | Never     |
| Anesthesiology Fellow                 | Never           | Almost Always        | Never         | Never         | Never          | Sometimes     | Rarely    | Never     |
| Anesthesiology Resident               | Never           | Always               | Never         | Sometimes     | Sometimes      | Almost Always | Sometimes | Never     |
| Certified Nurse Anesthetist           | Never           | Never                | Never         | Never         | Sometimes      | Almost Always | Never     | Never     |
| Advanced Practice Provider            | Sometimes       | Never                | Rarely        | Rarely        | Rarely         | Never         | Rarely    | Never     |
| Laryngoscopes available               |                 |                      |               |               |                |               |           |           |
| Macintosh Video Laryngoscope          | Yes             | Yes                  | Yes           | Yes           | Yes            | Yes           | Yes       | Yes       |
| Hyperangulated Video Laryngoscope     | Yes             | No                   | Yes           | Yes           | Yes            | Yes           | Yes       | Yes       |
| Direct Laryngoscope                   | Yes             | Yes                  | Yes           | Yes           | Yes            | Yes           | Yes       | Yes       |
| Pre-medication                        |                 |                      |               |               |                |               |           |           |
| Lidocaine                             | Never           | Never                | Never         | Never         | Never          | Rarely        | Rarely    | Never     |
| Atropine                              | Never           | Never                | Never         | Never         | Never          | Never         | Never     | Never     |
| Midazolam                             | Never           | Rarely               | Sometimes     | Sometimes     | Never          | Sometimes     | Rarely    | Never     |
| Fentanyl                              | Rarely          | Almost Always        | Rarely        | Sometimes     | Never          | Sometimes     | Sometimes | Rarely    |
| Bougie manufacturer                   | Sunmed          | Sunmed               | SunMed        | SunMed        | Smiths Medical | SunMed        | SunMed    | SunMed    |
| Bougie length (cm)                    | 70              | 70                   | 70            | 70            | 70             | 70            | 70        | 70        |
| Bougie - Coudé tip present            | Yes             | Yes                  | Yes           | Yes           | Yes            | Yes           | Yes       | Yes       |

|                                                                              |           |               |               |           |               |           |           |               |
|------------------------------------------------------------------------------|-----------|---------------|---------------|-----------|---------------|-----------|-----------|---------------|
| Bougie - packaged straight or curved                                         | Straight  | Straight      | Straight      | Straight  | Straight      | Straight  | Straight  | Straight      |
| Bougie bent before intubation                                                | Sometimes | Almost Always | Sometimes     | Sometimes | Almost Always | Rarely    | Sometimes | Sometimes     |
| How often was a bougie used on the first attempt before the BOUGIE trial?    | Rarely    | Rarely        | Sometimes     | Rarely    | Sometimes     | Rarely    | Rarely    | Always        |
| How often was a bougie used for rescue in this unit before the BOUGIE trial? | Sometimes | Sometimes     | Almost Always | Sometimes | Sometimes     | Sometimes | Rarely    | Almost Always |
| Endotracheal tube manufacturer                                               | Shiley    | Shiley        | Covidien      | Shiley    | Shiley        | Shiley    | Novaplus  | Parker        |

ICU, intensive care unit; MICU, medical ICU

UAB, University of Alabama at Birmingham; LSU, Louisiana State University; UW, University of Washington, Harborview; HCMC, Hennepin County Medical Center

### C. Characteristics of the study emergency departments

| Characteristic                                                            | Vanderbilt ED | UAB ED        | U of CO ED | Wake Forest ED | UW ED     | Denver Health ED | Lincoln ED    |
|---------------------------------------------------------------------------|---------------|---------------|------------|----------------|-----------|------------------|---------------|
| Approximate annual ED visits                                              | 72,000        | 65,000        | 102,000    | 100,000        | 53,000    | 60,000           | 144,000       |
| Number of beds                                                            | 58            | 51            | 92         | 41             | 49        | 53               | 56            |
| Estimated annual number of tracheal intubations                           | 750           | 900           | 300        | 600            | 300       | 500              | 400           |
| Personnel present at intubation                                           |               |               |            |                |           |                  |               |
| Critical Care Attending                                                   | Never         | Never         | Never      | Never          | Never     | Never            | Sometimes     |
| Critical Care Fellow                                                      | Never         | Never         | Never      | Never          | Never     | Never            | Rarely        |
| Internal Medicine Resident                                                | Never         | Never         | Never      | Never          | Never     | Never            | Rarely        |
| Emergency Medicine Attending                                              | Always        | Always        | Always     | Always         | Always    | Always           | Always        |
| Emergency Medicine Fellow                                                 | Rarely        | Never         | Sometimes  | Never          | Sometimes | Rarely           | Rarely        |
| Emergency Medicine Resident                                               | Almost Always | Almost Always | Always     | Always         | Always    | Always           | Almost Always |
| Anesthesiology Attending                                                  | Never         | Never         | Never      | Rarely         | Sometimes | Rarely           | Rarely        |
| Anesthesiology Fellow                                                     | Never         | Never         | Never      | Never          | Rarely    | Never            | Never         |
| Anesthesiology Resident                                                   | Never         | Never         | Never      | Rarely         | Sometimes | Never            | Never         |
| Certified Nurse Anesthetist                                               | Never         | Never         | Never      | Never          | Sometimes | Never            | Never         |
| Advanced Practice Provider                                                | Rarely        | Never         | Sometimes  | Sometimes      | Never     | Never            | Never         |
| Laryngoscopes available                                                   |               |               |            |                |           |                  |               |
| Macintosh Video Laryngoscope                                              | Yes           | Yes           | Yes        | Yes            | Yes       | Yes              | Yes           |
| Hyperangulated Video Laryngoscope                                         | Yes           | Yes           | Yes        | Yes            | Yes       | Yes              | Yes           |
| Direct Laryngoscope                                                       | Yes           | Yes           | Yes        | Yes            | Yes       | Yes              | Yes           |
| Pre-medication                                                            |               |               |            |                |           |                  |               |
| Lidocaine                                                                 | Rarely        | Never         | Rarely     | Never          | Rarely    | Rarely           | Rarely        |
| Atropine                                                                  | Rarely        | Never         | Rarely     | Never          | Sometimes | Rarely           | Rarely        |
| Midazolam                                                                 | Rarely        | Rarely        | Rarely     | Rarely         | Sometimes | Rarely           | Rarely        |
| Fentanyl                                                                  | Rarely        | Rarely        | Rarely     | Rarely         | Sometimes | Rarely           | Rarely        |
| Bougie manufacturer                                                       | SunMed        | SunMed        | SunMed     | SunMed         | SunMed    | SunMed           | SunMed        |
| Bougie length (cm)                                                        | 70            | 70            | 70         | 70             | 70        | 70               | 70            |
| Bougie - Coudé tip present                                                | Yes           | Yes           | Yes        | Yes            | Yes       | Yes              | Yes           |
| Bougie - packaged straight or curved                                      | Straight      | Straight      | Straight   | Straight       | Straight  | Straight         | Straight      |
| Bougie bent before intubation                                             | Rarely        | Almost Always | Sometimes  | Sometimes      | Sometimes | Sometimes        | Almost Always |
| How often was a bougie used on the first attempt before the BOUGIE trial? | Sometimes     | Sometimes     | Rarely     | Rarely         | Rarely    | Rarely           | Sometimes     |



|                                                                                       |           |               |               |           |           |               |           |
|---------------------------------------------------------------------------------------|-----------|---------------|---------------|-----------|-----------|---------------|-----------|
| How often was a bougie used for rescue attempts in this unit before the BOUGIE trial? | Sometimes | Almost Always | Almost Always | Sometimes | Sometimes | Almost Always | Sometimes |
| Endotracheal tube manufacturer                                                        | Covidien  | Shiley        | Shiley        | Vyair     | Shiley    | Shiley        | Covidien  |

ED, emergency department

UAB, University of Alabama at Birmingham; U of CO, University of Colorado; UW, University of Washington, Harborview.

#### **D. Inclusion and exclusion criteria**

##### Inclusion criteria:

1. Patient is located in a participating unit of an adult hospital
2. Planned procedure is tracheal intubation with sedative administration (or tracheal intubation without sedative administration in patients with decreased level of consciousness, cardiac arrest, or respiratory arrest)
3. Planned operator is a clinician expected to routinely perform tracheal intubation in the participating unit
4. Planned laryngoscopy device is a non-hyperangulated laryngoscope blade

##### Exclusion criteria:

1. Patient is pregnant
2. Patient is a prisoner
3. Urgency of intubation precludes safe performance of study procedures
4. Operator feels an approach to intubation other than use of a bougie or use of an endotracheal tube with stylet would be best for the care of the patient
5. Operator feels use of a bougie is required or contraindicated for the care of the patient
6. Operator feels use of an endotracheal tube with stylet is required or contraindicated for the care of the patient

The original inclusion criteria specified that patients must be at least 18 years old to be eligible. Because the age of critically ill patients presenting to the ED requiring emergency tracheal intubation is sometimes unknown (e.g., a patient with cardiac arrest presenting by ambulance without family) and patients who have the anatomic appearance of adults are likely to receive the same effects from a bougie as true adults, with approval from the cIRB at Vanderbilt University Medical Center, this criterion was revised on January 16, 2020 to be limited to patients located in a participating unit of an adult hospital. Ultimately, 4 patients were enrolled, 2 in the bougie group and 2 in the stylet group, who were subsequently discovered to be either 16 or 17 years old.

## E. Exploratory outcomes

Complete details of the statistical analysis plan have been published previously.<sup>9</sup>

Pre-specified exploratory outcomes included:

- Cormack-Lehane grade of glottic view, from grade 1 (best) to grade 4 (worst)
  - Grade 1: all or most of the glottic opening seen;
  - Grade 2: only the posterior portion of the glottis or only arytenoid cartilages are visible;
  - Grade 3: only the epiglottis but no portion of the glottis is visible;
  - Grade 4: neither the glottis nor the epiglottis can be seen.
- Number of laryngoscopy attempts
- Number of attempts at passing the bougie
- Number of attempts at passing the endotracheal tube
- Duration of intubation: The start of the procedure was defined as either the time of first sedative administration or, among patients who do not receive a sedative, the time of initiation of laryngoscopy. The end of the procedure was defined as the time of the final placement of an endotracheal tube within the trachea.
- Whether the video laryngoscope screen was viewed, among intubations where the operator used a video laryngoscope.
- Incidence of airway complications, including:
  - Esophageal intubation
  - Operator-reported aspiration during the procedure
  - Airway trauma (injury to oropharyngeal, glottic, or thoracic airway structures)
- Cardiac arrest within 1 hour following intubation
- Incidence of peri-intubation cardiovascular collapse, defined as one or more of:
  - New systolic blood pressure < 65 mmHg between induction and 2 minutes following intubation
  - New or increased vasopressor between induction and 2 minutes following intubation
  - Cardiac arrest within 1 hour of intubation
  - Death within 1 hour of intubation
- ICU-free days in the first 28 days (range: 0 to 28)

- Defined as the number of days, between enrollment and 28 days after enrollment, in which the patient is alive and not admitted to an intensive care unit service after the patient's final discharge from the intensive care unit. Patients who are never discharged from the intensive care unit receive a value of 0. Patients who die before day 28 receive a value of 0. For patients who return to an intensive care unit and are subsequently discharged prior to day 28, ICU-free days are counted from the date of final intensive care unit discharge. All data are censored hospital discharge or 28 days, whichever comes first.
- Ventilator free days in the first 28 days (range: 0 to 28)
  - Defined as the number of days, between enrollment and 28 days after enrollment, during which the patient is alive and with unassisted breathing and remains free of assisted breathing. If a patient returns to assisted breathing and subsequently achieves unassisted breathing prior to day 28, ventilator free days will be counted from the end of the last period of assisted breathing to day 28. If the patient is receiving assisted ventilation at day 28 or dies prior to day 28, ventilator free days are 0. If a patient is discharged while receiving assisted ventilation, ventilator free days are 0. All data is censored hospital discharge or 28 days, whichever comes first.
- All-cause, in-hospital mortality at 28 days

Post-hoc exploratory outcomes included:

- Pneumothorax present on the first chest radiograph obtained in the 48 hours after tracheal intubation.

## **F. Modeling of the primary outcome**

In order to understand the effect of use of a bougie vs use of an endotracheal tube with stylet on the primary outcome of successful intubation on the first attempt after accounting for (1) pre-specified baseline covariates, (2) correlation of patients within each study site, and (3) pre-specified baseline covariates that can only be assessed after randomization, we fit two multivariable models.

We fit a generalized linear mixed-effects model using a logit link function with the primary outcome as the dependent variable, operator and study site as random effects, and fixed effects of study group and the following pre-specified baseline covariates: age, sex, race, body-mass index, operator experience quantified as the operator's total number of prior intubations, and location of intubation (ED vs ICU). Age, body-mass index, and intubation experience were modeled with a nonlinear relationship to the outcome using restricted cubic splines with 3 knots. Location of knots were 10th, 50th, and 90th quantiles. The effect estimates were made by comparing the 75th percentile to the 25th percentile.

We also constructed a model with the following additional factors that may be interpreted as baseline covariates but which are unable to be assessed until after randomization: use of a video vs direct laryngoscope; presence of  $\geq 1$  difficult airway characteristic (body fluids obscuring glottic view, obesity, cervical immobilization, or facial trauma), and Cormack-Lehane grade 2, 3, or 4 laryngeal view.

Data on the primary outcome were available for all patients. Multiple imputations were used to impute missing baseline covariates in adjusted analyses using the R function "aregImpute" in Hmisc package. Variables used in the imputation model include: height, weight, hypoxemic respiratory failure as indication for intubation, obesity, trauma as a presenting diagnosis, sepsis or septic shock, altered mental status, pre-intubation cardiac arrest, acute respiratory distress syndrome, pneumonia, gastrointestinal bleeding, COVID-19, sedative agent, neuromuscular agent, oxygen saturation at induction, systolic blood pressure at induction, use of vasopressors in the hour prior to intubation, and laryngoscope type (direct or video).

## G. Effect modification (Subgroup analyses)

Complete details of the plan to evaluate for effect modification have been previously published.<sup>9</sup> Possible effect modification was assessed using a formal test of interaction between group assignment and the proposed effect modifier in the same multivariable model used for adjusted analysis of the primary outcome. The model included the following baseline covariates: age, sex, race, body-mass index, operator experience quantified as the operator's total number of prior intubations, and location of intubation (ED vs ICU). Age, body-mass index, and intubation experience were modeled with a nonlinear relationship to the outcome using restricted cubic splines with 3 knots. The following baseline variables were examined to determine if they modified the effect of study group on the primary outcome:

1. Operator Experience at the time of each enrollment
  - a. Total number of previous intubations performed by operator
  - b. Number of previous intubations performed by operator using a bougie
  - c. Proportion of previous intubations performed by the operator that were performed using a bougie
2. Location (ED vs ICU)
3. Indication for intubation (trauma vs medical)
4. Difficult airway, defined as one or more of the following difficult airway characteristics: obesity (body mass index > 30 kg/m<sup>2</sup>), cervical immobilization, or facial trauma.
5. Time period (before the COVID pandemic vs during or after the COVID pandemic)

In addition to the variables above, which can be assessed prior to enrollment, we performed exploratory analyses examining additional potential effect modifiers that are intended to represent baseline variables, but which are collected after enrollment, and therefore have the potential to be affected by study group assignment. These included:

1. Laryngoscope type (Direct laryngoscope [without video capability] vs video laryngoscope [with video capability])
2. Presence body fluids obscuring glottic view (Yes vs No)
3. Cormack Lehane grade of view (1 vs 2-4).

## H. Sensitivity analyses of the primary outcome

To assess the robustness of the findings for the primary outcome, we repeated the main analysis of the primary outcome with the following alternate populations or alternate definitions of successful intubation on the first attempt:

1. Excluding intubations performed with hyperangulated blades: This analysis excluded patients for whom a hyperangulated laryngoscope blade was used on the first attempt at intubation.
2. Counting crossovers as failures: This analysis assigned failure for the primary outcome for all patients for whom the operator crossed over from the assigned device to the non-assigned device.
3. Including only patients with complete observer data: This analysis included only cases in which primary outcome data from the independent observer was complete (i.e., excluding cases in which the operator's self-report of whether there was successful intubation on the first attempt was used to calculate the primary outcome for that patient).
4. Excluding cases in which the operator had  $\leq 10$  total prior intubations: Because prior intubating experience may influence success with both devices, this analysis excluded cases where the operator had  $\leq 10$  total prior intubations.
5. Excluding cases where the operator had  $\leq 5$  total prior intubations using a bougie: Because prior experience with using a bougie may influence successful intubation in the bougie group, this analysis excluded cases where the operator had  $\leq 5$  prior intubations while using a bougie.
6. Defining successful intubation on the first attempt as intubation with one insertion of the laryngoscope blade: This analysis defined successful intubation on the first attempt as successful tracheal intubation during the first insertion of the laryngoscope blade, regardless of the number of insertions of a bougie or endotracheal tube.

## **I. Handling of missing data**

No patient was missing data for the primary outcome. When data were missing for the secondary or exploratory outcomes, we performed complete-case analysis, excluding cases where the data for the analyzed outcome were missing. In adjusted analyses, missing data for baseline covariates was imputed using multiple imputations.

Multiple imputations used the R function “aregImpute” in Hmisc package. Variables used in the imputation model include: height, weight, hypoxemic respiratory failure as indication for intubation, obesity, trauma as a presenting diagnosis, sepsis or septic shock, altered mental status, pre-intubation cardiac arrest, acute respiratory distress syndrome, pneumonia, gastrointestinal bleeding, COVID-19, sedative agent, neuromuscular agent, oxygen saturation at induction, systolic blood pressure at induction, use of vasopressors in the hour prior to intubation, and laryngoscope type (direct or video).



## **J. Results of the interim analysis**

After the enrollment of 553 patients, the data and safety monitoring board conducted a single interim analysis to compare the incidence of successful intubation on the first attempt between groups using a Haybittle–Peto stopping boundary for efficacy of  $P < 0.001$ . At the time of the single interim analysis, successful intubation on the first attempt had occurred in 237 patients (85%) in the bougie group and 223 patients (82%) in the stylet group ( $P = 0.31$ ).

## Supplemental Figures

### eFigure 1. Cumulative proportion of patients successfully intubated.

Shown is the cumulative proportion of patients successfully intubated over time (in seconds) following the induction of anesthesia. The figure displays data for the 1,073 patients for whom information on the time from induction to intubation was available.

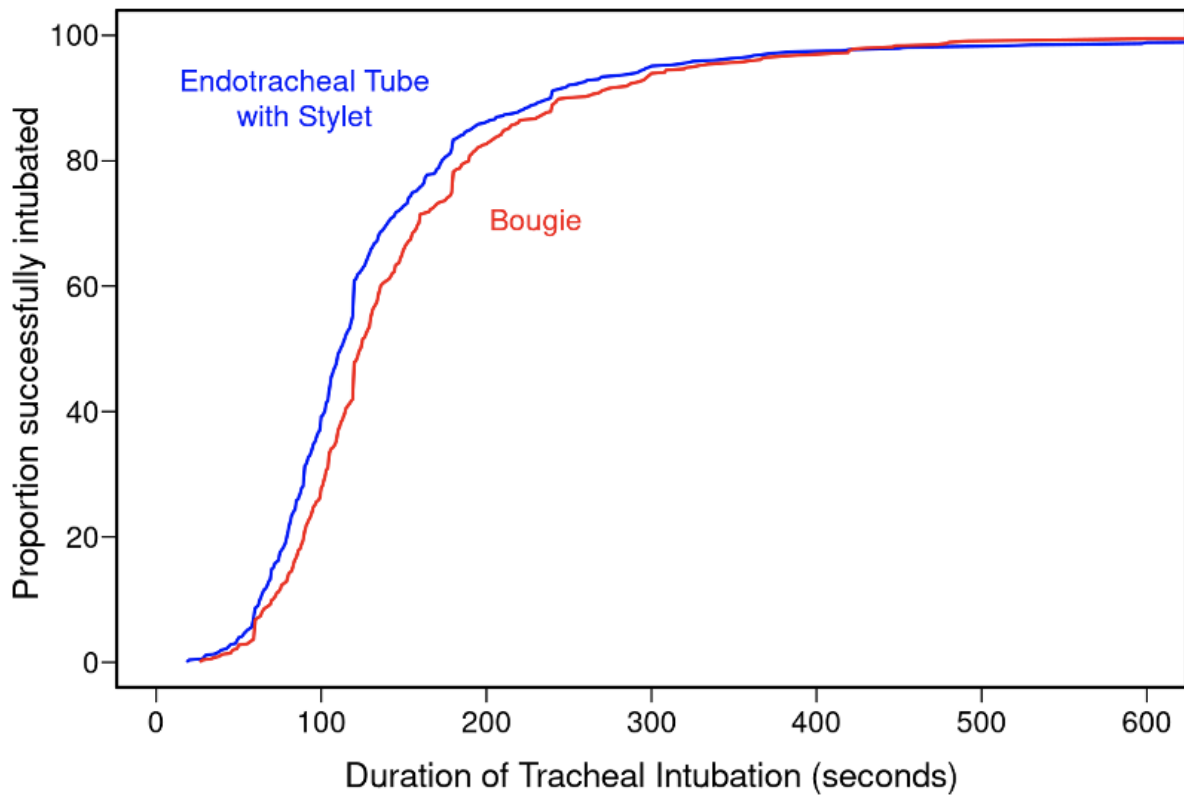

**eFigure 2. Calibration plot for the first model used for adjusted analysis of the primary outcome**

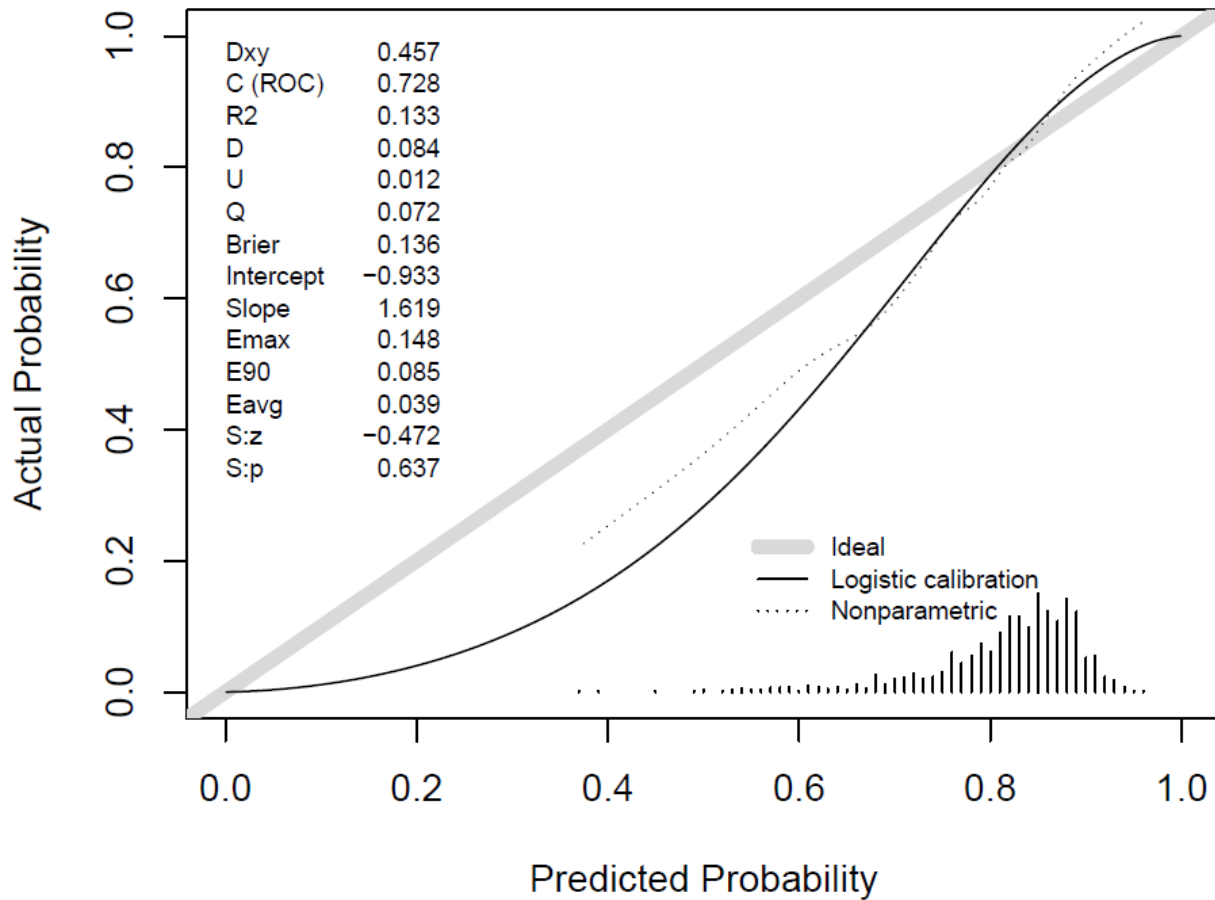

This figure shows the calibration plot for the model fit for the first adjusted analysis of the primary outcome, a generalized linear mixed-effects model using a logit link function with the primary outcome as the dependent variable, operator and study site as random effects, and fixed effects of study group and the pre-specified baseline covariates. Additional details of the model are included in Supplemental Methods section F. Results of the model are shown in eTable 9.

eFigure 3. Calibration plot for the second model used for adjusted analysis of the primary outcome

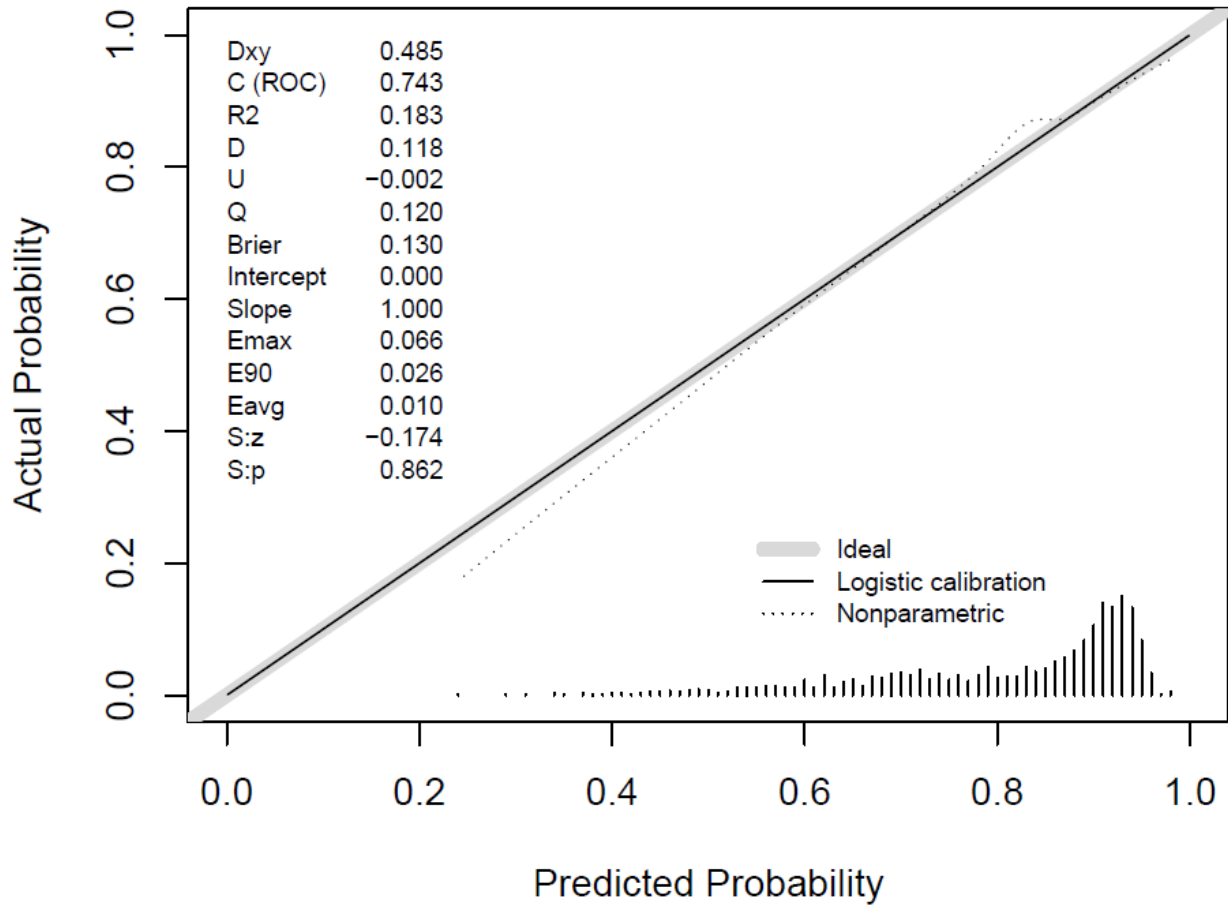

This figure shows the calibration plot for the model fit for the second adjusted analysis of the primary outcome, a generalized linear mixed-effects model using a logit link function with the primary outcome as the dependent variable, operator and study site as random effects, and fixed effects of study group and the pre-specified baseline and semi-baseline covariates. Additional details of the model are included in Supplemental Methods section F. Results of the model are shown in eTable 9.

**eFigure 4. Successful intubation on the first attempt by prior operator experience**

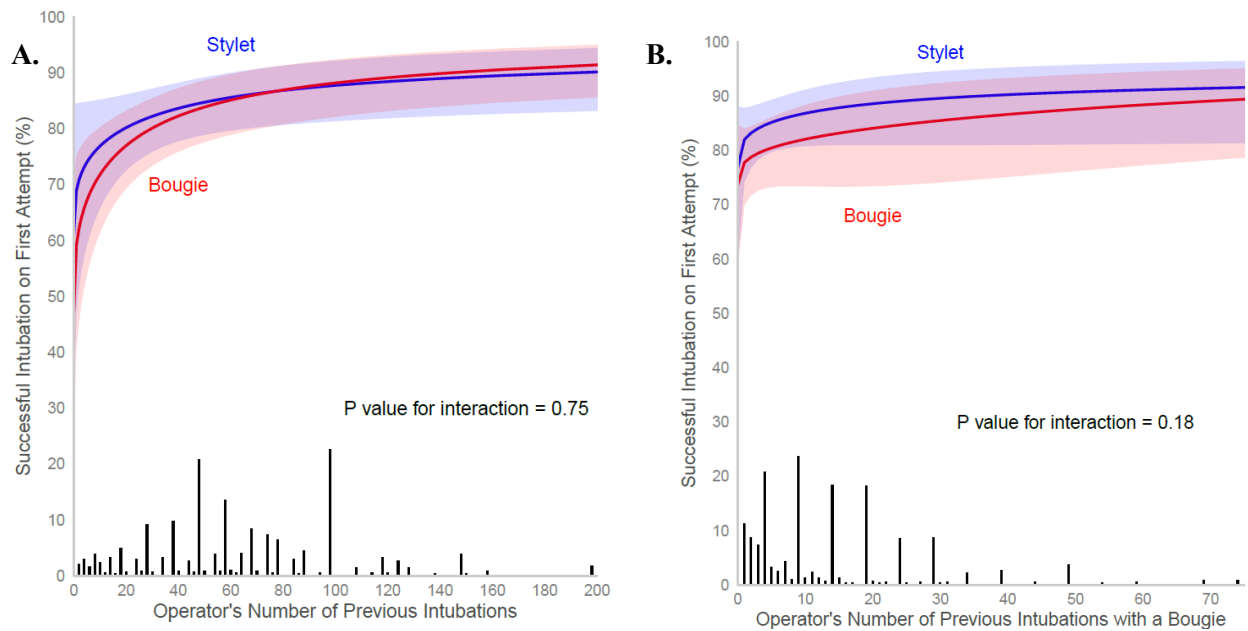

Panel A shows the relationship between an operator's number of previous tracheal intubations and the probability of successful intubation on the first attempt in the bougie group (red) and the stylet group (blue). Panel B shows the relationship between an operator's number of previous tracheal intubations using a bougie and the probability of successful intubation on the first attempt, by group. Shaded bands denote 95% confidence intervals. A histogram on the x-axis shows the distribution of previous operator experience. Operators' previous intubating experience did not appear to modify the effect of trial group assignment on the primary outcome.

**eFigure 5. Successful intubation on the first attempt by site.**

Shown is the unadjusted absolute risk difference in the primary outcome of successful intubation on the first attempt between use of a bougie and use of an endotracheal tube and stylet for patients at each of the 15 trial sites. Horizontal bars represent the 95% confidence intervals around the absolute risk difference. The number of patients in each group and the incidence of the primary outcome in each group with 95% confidence intervals are shown. ED = Emergency Department; ICU = Intensive Care Unit.

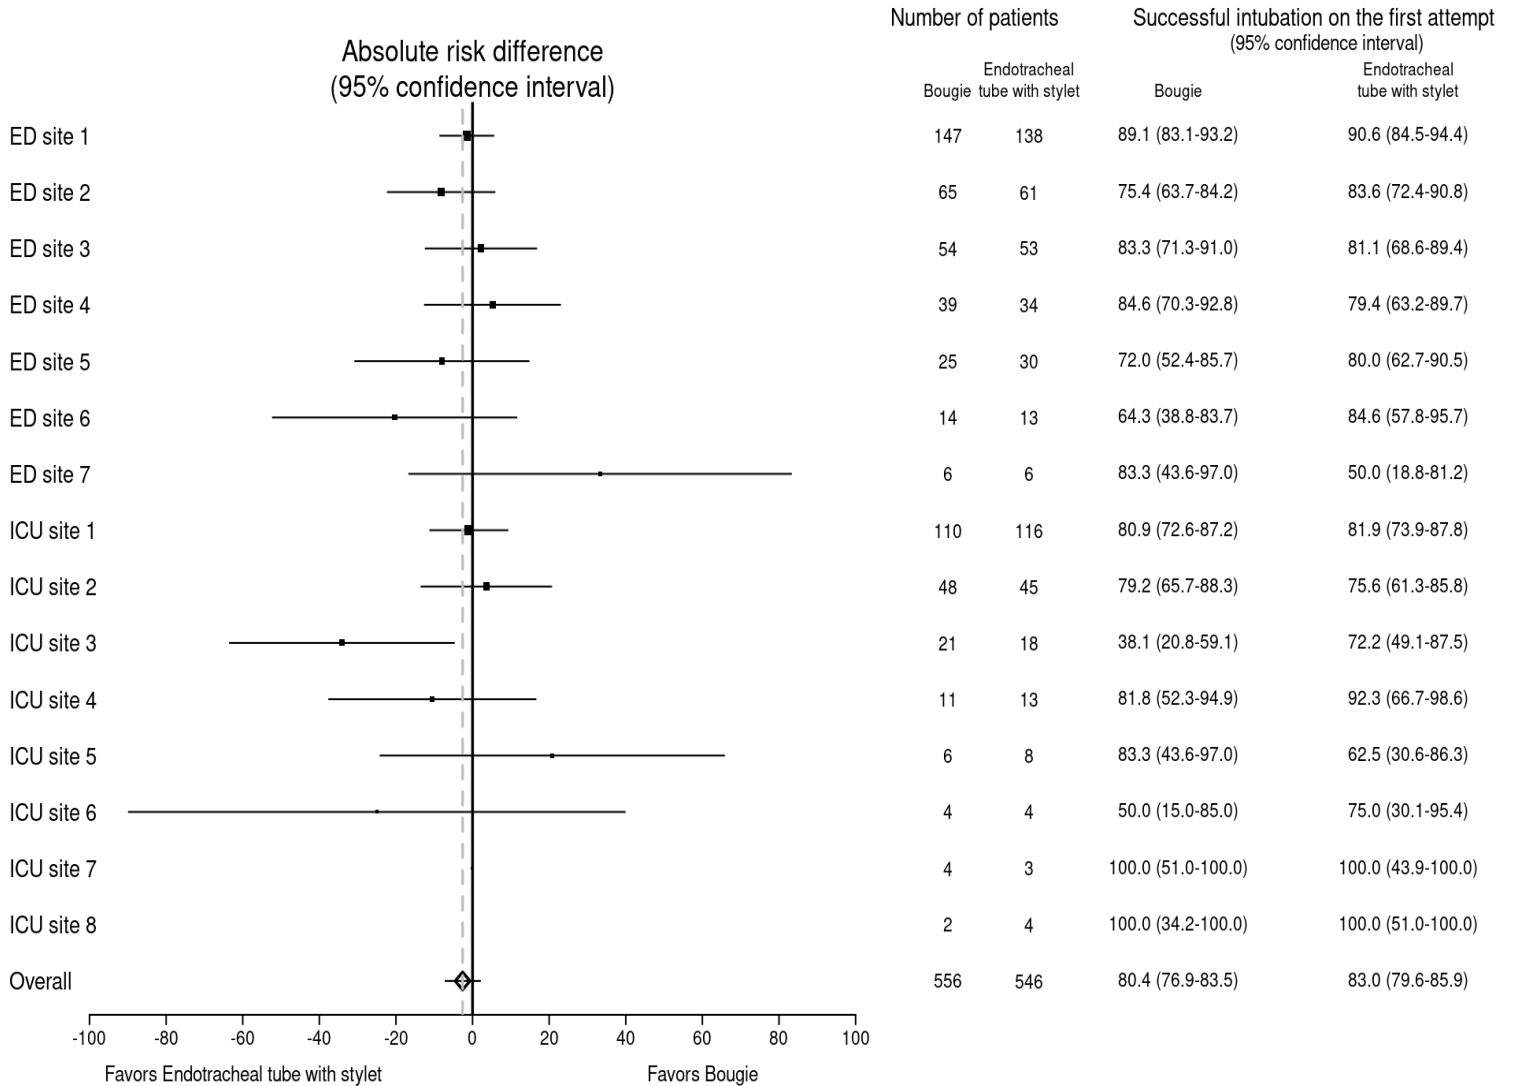

**eFigure 6. Cumulative proportion of patients successfully intubated on the first attempt.**

In contrast to eFigure 1, this figure shows the cumulative proportion of patients successfully intubated on the *first attempt* over time (in seconds) following the induction of anesthesia. The 202 patients not successfully intubated on the first attempt are not shown in this figure, nor are 24 patients who achieved the primary outcome but had missing data on the duration of tracheal intubation.

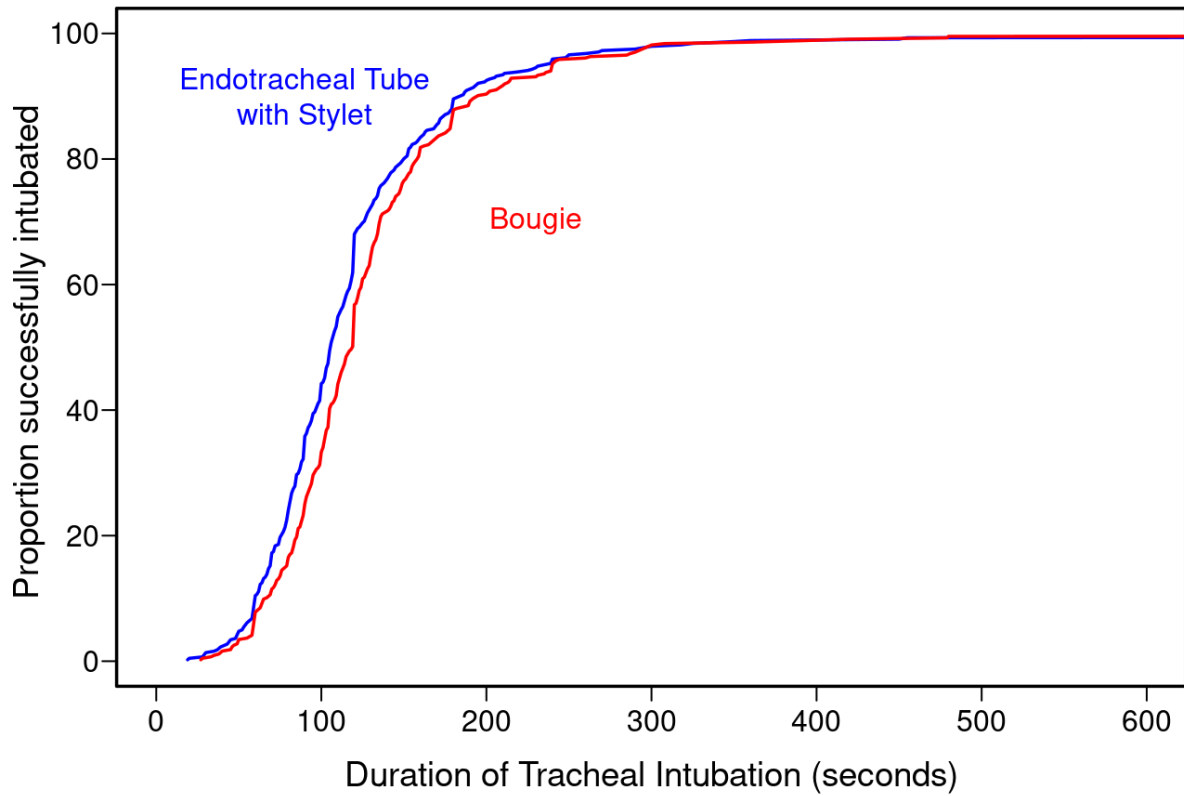

## Supplementary Tables

**eTable 1. Chronic comorbidities.**

| Comorbidity                                 | Bougie group<br>N=556 | Stylet group<br>N=546 |
|---------------------------------------------|-----------------------|-----------------------|
| <b>Respiratory conditions – no. (%)</b>     |                       |                       |
| Chronic obstructive pulmonary disease       | 81 (14.6)             | 74 (13.6)             |
| Obstructive sleep apnea                     | 20 (3.6)              | 24 (4.4)              |
| Asthma                                      | 19 (3.4)              | 24 (4.4)              |
| Pulmonary or pleural malignancy             | 12 (2.2)              | 11 (2.0)              |
| Interstitial lung disease                   | 10 (1.8)              | 10 (1.8)              |
| Pulmonary hypertension                      | 9 (1.6)               | 9 (1.6)               |
| Neuromuscular weakness                      | 8 (1.4)               | 7 (1.3)               |
| Recurrent aspiration                        | 2 (0.4)               | 3 (0.5)               |
| Cystic fibrosis                             | 1 (0.2)               | 0                     |
| Other respiratory condition                 | 19 (3.4)              | 14 (2.6)              |
| <b>Non-respiratory conditions – no. (%)</b> |                       |                       |
| Hypertension                                | 190 (34.2)            | 200 (36.6)            |
| Diabetes mellitus                           | 111 (20.0)            | 111 (20.3)            |
| Hepatic cirrhosis                           | 56 (10.1)             | 71 (13.0)             |
| Atrial fibrillation                         | 51 (9.2)              | 47 (8.6)              |
| Congestive heart failure                    | 50 (9)                | 47 (8.6)              |
| Coronary artery disease                     | 49 (8.8)              | 54 (9.9)              |
| Cerebrovascular accident                    | 46 (8.3)              | 40 (7.3)              |
| Chronic kidney disease                      | 44 (7.9)              | 50 (9.2)              |
| Solid malignancy, non-pulmonary             | 39 (7.0)              | 38 (7.0)              |
| End stage renal disease                     | 26 (4.7)              | 13 (2.4)              |
| Solid organ transplant                      | 24 (4.3)              | 11 (2.0)              |
| Hematologic malignancy                      | 19 (3.4)              | 18 (3.3)              |
| Traumatic brain injury                      | 3 (0.5)               | 7 (1.3)               |
| Spinal cord injury                          | 3 (0.5)               | 4 (0.7)               |
| Stem cell or bone marrow transplant         | 2 (0.4)               | 2 (0.4)               |
| Other non-respiratory condition             | 94 (16.9)             | 102 (18.7)            |



**eTable 2. Active medical conditions at the time of intubation.**

| <b>Condition</b>                                   | <b>Bougie group<br/>N=556</b> | <b>Stylet group<br/>N=546</b> |
|----------------------------------------------------|-------------------------------|-------------------------------|
| Glasgow coma score, median (IQR)                   | 11 (7-14)                     | 10 (6-14)                     |
| <b>Neurologic – no. (%)</b>                        |                               |                               |
| Altered mental status                              | 372 (66.9)                    | 393 (72.0)                    |
| Seizure                                            | 51 (9.2)                      | 53 (9.7)                      |
| Intracranial hemorrhage                            | 42 (7.6)                      | 45 (8.2)                      |
| Stroke                                             | 35 (6.3)                      | 27 (4.9)                      |
| Traumatic brain injury                             | 20 (3.6)                      | 21 (3.8)                      |
| Meningitis or encephalitis                         | 3 (0.5)                       | 6 (1.1)                       |
| Spinal cord compression                            | 2 (0.4)                       | 3 (0.5)                       |
| Myasthenic crisis                                  | 2 (0.4)                       | 0                             |
| <b>Cardiac – no. (%)</b>                           |                               |                               |
| Cardiac arrest                                     | 21 (3.8)                      | 20 (3.7)                      |
| Decompensated heart failure                        | 19 (3.4)                      | 11 (2.0)                      |
| Myocardial infarction                              | 14 (2.5)                      | 19 (3.5)                      |
| Hypertensive urgency or emergency                  | 10 (1.8)                      | 13 (2.4)                      |
| Cardiogenic shock                                  | 6 (1.1)                       | 8 (1.5)                       |
| <b>Pulmonary – no. (%)</b>                         |                               |                               |
| Hypoxemic respiratory failure                      | 191 (34.4)                    | 202 (37.0)                    |
| Hypercarbic respiratory failure                    | 73 (13.1)                     | 60 (11.0)                     |
| Pneumonia                                          | 58 (10.4)                     | 45 (8.2)                      |
| Acute respiratory distress syndrome                | 30 (5.4)                      | 19 (3.5)                      |
| Chronic obstructive pulmonary disease exacerbation | 18 (3.2)                      | 13 (2.4)                      |
| Aspiration                                         | 11 (2.0)                      | 10 (1.8)                      |
| Upper airway obstruction                           | 4 (0.7)                       | 2 (0.4)                       |
| Asthma exacerbation                                | 0                             | 1 (0.2)                       |
| <b>Gastrointestinal – no. (%)</b>                  |                               |                               |
| Gastrointestinal bleeding                          | 51 (9.2)                      | 48 (8.8)                      |
| Acute liver failure                                | 15 (2.7)                      | 12 (2.2)                      |
| Bowel obstruction                                  | 6 (1.1)                       | 2 (0.4)                       |
| Pancreatitis                                       | 5 (0.9)                       | 5 (0.9)                       |
| Hepatorenal syndrome                               | 4 (0.7)                       | 7 (1.3)                       |
| Bowel perforation                                  | 1 (0.2)                       | 3 (0.5)                       |

**eTable 3. Primary indication for tracheal intubation.**

| <b>Indication – no. (%)</b>                 | <b>Bougie group<br/>N=556</b> | <b>Stylet group<br/>N=546</b> |
|---------------------------------------------|-------------------------------|-------------------------------|
| Altered mental status                       | 246 (44.2)                    | 246 (45.1)                    |
| Hypoxic respiratory failure                 | 116 (20.9)                    | 107 (19.6)                    |
| Hypercarbic and hypoxic respiratory failure | 35 (6.3)                      | 41 (7.5)                      |
| Hypercarbic respiratory failure             | 28 (5.0)                      | 17 (3.1)                      |
| Emergency Procedure                         | 36 (6.5)                      | 31 (5.7)                      |
| Seizure                                     | 26 (4.7)                      | 22 (4.0)                      |
| Agitation                                   | 14 (2.5)                      | 17 (3.1)                      |
| Cardiac arrest                              | 13 (2.3)                      | 14 (2.6)                      |
| Upper airway obstruction                    | 13 (2.3)                      | 12 (2.2)                      |
| Hemodynamic instability                     | 8 (1.4)                       | 11 (2.0)                      |
| Metabolic acidosis                          | 3 (0.5)                       | 3 (0.5)                       |
| Respiratory arrest                          | 2 (0.4)                       | 1 (0.2)                       |
| Hemoptysis                                  | 1 (0.2)                       | 2 (0.4)                       |
| Other                                       | 15 (2.7)                      | 22 (4.0)                      |

**eTable 4. Difficult airway characteristics.**

| <b>Difficult Airway Characteristic – no. (%)</b>                     | <b>Bougie group<br/>N=556</b> | <b>Stylet group<br/>N=546</b> |
|----------------------------------------------------------------------|-------------------------------|-------------------------------|
| One or more difficult airway characteristics – no. (%) <sup>a</sup>  | 259 (46.6)                    | 263 (48.2)                    |
| Obesity <sup>b</sup>                                                 | 158 (28.4)                    | 158 (28.9)                    |
| Glottic view obscured by body fluids or blood <sup>c</sup>           | 50 (9.0)                      | 56 (10.3)                     |
| Cervical collar before intubation <sup>c</sup>                       | 48 (8.6)                      | 56 (10.3)                     |
| Obstructive sleep apnea <sup>d</sup>                                 | 20 (3.6)                      | 24 (4.4)                      |
| Limited neck mobility <sup>d</sup>                                   | 17 (3.1)                      | 15 (2.7)                      |
| Vomiting <sup>d</sup>                                                | 12 (2.2)                      | 7 (1.3)                       |
| Upper gastrointestinal bleeding complicating intubation <sup>d</sup> | 11 (2.0)                      | 11 (2.0)                      |
| Witnessed aspiration <sup>d</sup>                                    | 9 (1.6)                       | 7 (1.3)                       |
| Facial trauma <sup>c</sup>                                           | 6 (1.1)                       | 13 (2.4)                      |
| Upper airway mass, infection, or trauma <sup>d</sup>                 | 6 (1.1)                       | 4 (0.7)                       |
| Limited mouth opening <sup>d</sup>                                   | 5 (0.9)                       | 3 (0.5)                       |
| Epistaxis or oral bleeding <sup>d</sup>                              | 2 (0.4)                       | 5 (0.9)                       |
| Head and neck radiation <sup>d</sup>                                 | 1 (0.2)                       | 0                             |
| Other <sup>d</sup>                                                   | 33 (5.9)                      | 25 (4.6)                      |

a. Patients could have more than one.

b. Obesity is defined as body-mass index > 30 kg/m<sup>2</sup> or, when the body-mass index was not available, based on a diagnosis of obesity in the medical record.

c. Reported by the operator immediately after completion of the intubation procedure

d. Collected through chart review by study staff



**eTable 5. Operator characteristics.**

| <b>Characteristic</b>                                              | <b>Bougie group<br/>N=556</b> | <b>Stylet group<br/>N=546</b> |
|--------------------------------------------------------------------|-------------------------------|-------------------------------|
| No. of unique operators                                            | 244                           | 264                           |
| No. of enrollments per operator                                    |                               |                               |
| Median (IQR)                                                       | 1 (1-3)                       | 1 (1-2)                       |
| Range                                                              | 1 to 12                       | 1 to 15                       |
| <b>Operator specialty<sup>a</sup> – no. (%)</b>                    |                               |                               |
| Emergency Medicine                                                 | 354 (63.7)                    | 339 (62.1)                    |
| Critical Care                                                      | 189 (34.0)                    | 194 (35.5)                    |
| Anesthesia                                                         | 10 (1.8)                      | 11 (2.0)                      |
| Other or unknown                                                   | 4 (0.8)                       | 6 (1.1)                       |
| <b>Operator training level – no. (%)</b>                           |                               |                               |
| Resident                                                           | 344 (61.9)                    | 335 (61.4)                    |
| Fellow                                                             | 187 (33.6)                    | 186 (34.1)                    |
| Attending physician                                                | 13 (2.3)                      | 13 (2.4)                      |
| Other or unknown <sup>b</sup>                                      | 12 (2.2)                      | 12 (2.2)                      |
| <b>Prior intubation experience<sup>c</sup></b>                     |                               |                               |
| No. of previous intubations, median (IQR)                          | 60 (35-100)                   | 60 (40-100)                   |
| No. of previous intubations performed using a bougie, median (IQR) | 10 (4-20)                     | 10 (4-20)                     |

a. Some operators reported more than one specialty.

b. Other intubator training level included nurse anesthetist, nurse practitioner, and physician assistant.

c. This is the operator's self-reported intubation experience at the time of enrollment

**eTable 6. Characteristics of the intubation procedure with marginal estimates**

| Measure                                                       | Bougie group<br>n=556 | Stylet group<br>n=546 | Absolute difference or<br>median difference<br>(95% CI) |
|---------------------------------------------------------------|-----------------------|-----------------------|---------------------------------------------------------|
| <b>Before induction</b>                                       |                       |                       |                                                         |
| Plan to use a direct laryngoscope - no. (%)                   | 142/551 (25.8)        | 151/543 (27.8)        | -2.0% (-7.5% to 3.4%)                                   |
| Preoxygenation performed - no. (%)                            | 552 (99.3)            | 544 (99.6)            | -0.4% (-1.4% to 0.7%)                                   |
| Preoxygenation with positive pressure - no. (%)               | 154 (27.7)            | 133 (24.4)            | 3.3% (-2.0% to 8.7%)                                    |
| Oxygen saturation at induction, median (IQR) - % <sup>a</sup> | 100 (97-100)          | 100 (97-100)          | 0 (0 to 1)                                              |
| Oxygen saturation < 90% at induction – no. (%)                | 33/533 (6.2)          | 32/528 (6.1)          | 0.1% (-2.9% to 3.1%)                                    |
| <b>Induction through initiation of laryngoscopy – no. (%)</b> |                       |                       |                                                         |
| Sedative administered                                         | 545 (98.0)            | 532 (97.4)            | 0.6% (-1.4% to 2.5%)                                    |
| Neuromuscular blocking agent administered                     | 539 (96.9)            | 531 (97.3)            | -0.3% (-2.5% to 1.9%)                                   |
| <b>Laryngoscopy and Intubation</b>                            |                       |                       |                                                         |
| Initial laryngoscope used – no. (%)                           |                       |                       |                                                         |
| Direct laryngoscope                                           | 132 (23.7)            | 142 (26.0)            | -2.3% (-7.6% to 3.0%)                                   |
| Macintosh video laryngoscope                                  | 421 (75.7)            | 403 (73.8)            | 1.9% (-3.4% to 7.2%)                                    |
| Other                                                         | 3 (0.5)               | 1 (0.2)               | 0.4% (-0.5% to 1.2%)                                    |
| First device to enter mouth after the laryngoscope – no. (%)  |                       |                       |                                                         |
| Bougie                                                        | 548 (98.6)            | 12 (2.2)              | 96.4% (94.6% to 98.1%)                                  |
| Stylet                                                        | 3 (0.5)               | 531 (97.3)            | -96.7% (-98.4% to -95.0%)                               |
| No device passed                                              | 5 (0.9)               | 3 (0.5)               | 0.3% (-0.8% to 1.5%)                                    |

a. Data on oxygen saturation at induction were missing in 41 patients (3.7%): 23 in the bougie group and 18 in the stylet group.

**eTable 7. Additional characteristics of the intubation procedure.**

| Characteristic                                                                                                             | Bougie group<br>n=556 | Stylet group<br>n=546 | Absolute difference or median<br>difference<br>(95% CI) |
|----------------------------------------------------------------------------------------------------------------------------|-----------------------|-----------------------|---------------------------------------------------------|
| <b>Before induction</b>                                                                                                    |                       |                       |                                                         |
| Bilevel positive pressure or high flow nasal cannula in the hour before intubation, not including preoxygenation – no. (%) | 140 (25.2)            | 124 (22.7)            | 2.5% (-2.7% to 7.7%)                                    |
| Preoxygenation device <sup>a</sup> – no. (%)                                                                               |                       |                       |                                                         |
| Nasal Cannula                                                                                                              | 186 (33.5)            | 200 (36.6)            | -3.2% (-9.0% to 2.6%)                                   |
| High flow nasal cannula                                                                                                    | 68 (12.2)             | 62 (11.4)             | 0.9% (-3.1% to 4.9%)                                    |
| Non-rebreather mask                                                                                                        | 286 (51.4)            | 291 (53.3)            | -1.9% (-7.9% to 4.2%)                                   |
| Bag mask (no ventilation)                                                                                                  | 37 (6.7)              | 48 (8.8)              | -2.1% (-5.5% to 1.2%)                                   |
| Bag mask (with ventilation)                                                                                                | 68 (12.2)             | 63 (11.5)             | 0.7% (-3.3% to 4.7%)                                    |
| Bilevel positive pressure                                                                                                  | 86 (15.5)             | 71 (13.0)             | 2.5% (-1.8% to 6.8%)                                    |
| Other                                                                                                                      | 15 (2.7)              | 21 (3.8)              | -1.1% (-3.4% to 1.1%)                                   |
| None                                                                                                                       | 4 (0.7)               | 2 (0.4)               | 0.4% (-0.7% to 1.4%)                                    |
| <b>Induction</b>                                                                                                           |                       |                       |                                                         |
| Systolic blood pressure at induction, median (IQR) – mm Hg <sup>b</sup>                                                    | 134 (115-153)         | 128 (110-150)         | 6 (2 to 11)                                             |
| Sedative medication for induction <sup>a</sup>                                                                             |                       |                       |                                                         |
| Etomidate – no. (%)                                                                                                        | 383 (68.9)            | 375 (68.7)            | 0.2% (-5.4% to 5.9%)                                    |
| Median Dose (IQR) - mg                                                                                                     | 20 (20-20)            | 20 (20-20)            | 0 (0 to 0)                                              |
| Ketamine – no. (%)                                                                                                         | 136 (24.5)            | 133 (24.4)            | 0.1% (-5.1% to 5.3%)                                    |
| Median Dose (IQR) - mg                                                                                                     | 150 (100-150)         | 150 (100-150)         | 0 (0 to 0)                                              |
| Propofol – no. (%)                                                                                                         | 13 (2.3)              | 16 (2.9)              | -0.6% (-2.7% to 1.5%)                                   |
| Median Dose (IQR) - mg                                                                                                     | 80 (50-105)           | 80 (70-100)           | 0 (-40 to 40)                                           |
| Midazolam – no. (%)                                                                                                        | 22 (4.0)              | 17 (3.1)              | 0.8% (-1.5% to 3.2%)                                    |
| Median Dose (IQR) - mg                                                                                                     | 2 (2-3.8)             | 2 (2-4)               | 0 (-2 to 1)                                             |
| Fentanyl – no. (%)                                                                                                         | 7 (1.3)               | 8 (1.5)               | -0.2% (-1.8% to 1.3%)                                   |
| Median Dose (IQR) - mcg                                                                                                    | 100 (50-100)          | 100 (50-200)          | 0 (-150 to 50)                                          |
| Lorazepam – no. (%)                                                                                                        | 3 (0.5)               | 3 (0.5)               | -0.0% (-0.9% to 0.9%)                                   |
| Median Dose (IQR) - mg                                                                                                     | 3 (2-4)               | 6 (6-10)              | -4 (-8 to -2)                                           |
| Neuromuscular blockade <sup>a</sup>                                                                                        |                       |                       |                                                         |
| Succinylcholine – no. (%)                                                                                                  | 217 (39.0)            | 224 (41.0)            | -2.0% (-8.0% to 4.0%)                                   |
| Median Dose (IQR) - mg                                                                                                     | 120 (100-150)         | 120 (100-150)         | 0 (-30 to 20)                                           |

|                                                                  |              |              |                       |
|------------------------------------------------------------------|--------------|--------------|-----------------------|
| Rocuronium – no. (%)                                             | 324 (58.3)   | 306 (56.0)   | 2.2% (-3.8% to 8.3%)  |
| Median Dose (IQR) - mg                                           | 100 (70-100) | 100 (70-100) | 0 (0 to 0)            |
| Cisatracurium – no. (%)                                          | 0            | 1 (0.2)      | -0.2% (-0.7% to 0.4%) |
| None – no. (%) <sup>c</sup>                                      | 17 (3.1)     | 15 (2.7)     | 0.3% (-1.7% to 2.3%)  |
| <b>Between induction and laryngoscopy – no. (%)</b>              |              |              |                       |
| Positive pressure ventilation between induction and laryngoscopy | 203 (36.5)   | 210 (38.5)   | -2.0% (-7.8% to 3.9%) |
| <b>Laryngoscopy</b>                                              |              |              |                       |
| Initial laryngoscope used – no. (%)                              |              |              |                       |
| Direct laryngoscope, curved blade                                | 112 (20.1)   | 126 (23.1)   | -2.9% (-8.0% to 2.1%) |
| Direct laryngoscope, straight blade                              | 11 (2.0)     | 13 (2.4)     | -0.4% (-2.3% to 1.5%) |
| Direct laryngoscope, blade shape unknown                         | 9 (1.6)      | 3 (0.5)      | 1.1% (-0.3% to 2.5%)  |
| C-MAC Macintosh Blade                                            | 298 (53.6)   | 276 (50.5)   | 3.0% (-3.0% to 9.1%)  |
| McGrath MAC Macintosh Blade                                      | 85 (15.3)    | 86 (15.8)    | -0.5% (-4.9% to 4.0%) |
| GlideScope Titanium MAC blade                                    | 38 (6.8)     | 41 (7.5)     | -0.7% (-3.7% to 2.4%) |
| Hyperangulated video laryngoscope                                | 3 (0.5)      | 0            | 0.5% (0.0% to 1.1%)   |
| Other <sup>d</sup>                                               | 0            | 1 (0.2)      | -0.2% (-0.7% to 0.4%) |

All values are no. (%) unless otherwise specified

a. Patients could receive more than one preoxygenation device, sedative, and neuromuscular blocking agent.

b. Systolic blood pressure data at induction were missing in 41 patients (3.7%): 27 in the bougie group and 14 in the stylet group.

c. Patients who were comatose (e.g., those experiencing cardiac arrest) could be intubated without a sedative and neuromuscular blocker

d. One patient underwent intubation using a flexible bronchoscope.



**eTable 8. Patients who did not receive the assigned device on the first laryngoscope attempt**

| Patient                                                                | Device assigned | Device used on the first laryngoscope insertion | Reason for not using the assigned device | Number of laryngoscope insertions | Number of bougie insertions | Number of endotracheal tube insertions | Lowest oxygen saturation (%) |
|------------------------------------------------------------------------|-----------------|-------------------------------------------------|------------------------------------------|-----------------------------------|-----------------------------|----------------------------------------|------------------------------|
| <b>Crossovers from the assigned device to the non-assigned device.</b> |                 |                                                 |                                          |                                   |                             |                                        |                              |
| Patient 1                                                              | Tube + stylet   | Bougie                                          | Poor glottic view                        | 2                                 | 2                           | 2                                      | 67                           |
| Patient 2                                                              | Tube + stylet   | Bougie                                          | Poor glottic view                        | 1                                 | 1                           | 1                                      | 98                           |
| Patient 3                                                              | Tube + stylet   | Bougie                                          | Poor glottic view                        | 1                                 | 2                           | 1                                      | 85                           |
| Patient 4                                                              | Tube + stylet   | Bougie                                          | Poor glottic view                        | 1                                 | 1                           | 1                                      | 100                          |
| Patient 5                                                              | Tube + stylet   | Bougie                                          | Poor glottic view                        | 1                                 | 1                           | 1                                      | 100                          |
| Patient 6                                                              | Tube + stylet   | Bougie                                          | Poor glottic view                        | 1                                 | 1                           | 1                                      | 95                           |
| Patient 7                                                              | Tube + stylet   | Bougie                                          | Poor glottic view                        | 1                                 | 1                           | 1                                      | 94                           |
| Patient 8                                                              | Tube + stylet   | Bougie                                          | Poor glottic view                        | 1                                 | 1                           | 1                                      | 92                           |
| Patient 9                                                              | Tube + stylet   | Bougie                                          | Poor glottic view                        | 1                                 | 1                           | 1                                      | 78                           |
| Patient 10                                                             | Tube + stylet   | Bougie                                          | Poor glottic view                        | 1                                 | 1                           | 1                                      | 99                           |
| Patient 11                                                             | Tube + stylet   | Bougie                                          | Poor glottic view                        | 1                                 | 1                           | 1                                      | 97                           |
| Patient 12                                                             | Tube + stylet   | Bougie                                          | Operator error                           | 1                                 | 1                           | 1                                      | 96                           |
| Patient 13                                                             | Bougie          | Tube + stylet                                   | Bougie not available                     | 1                                 | 0                           | 1                                      | Unknown                      |
| Patient 14                                                             | Bougie          | Tube + stylet                                   | Physician preference                     | 1                                 | 1 <sup>a</sup>              | 2                                      | 92                           |
| Patient 15                                                             | Bougie          | Tube + stylet                                   | Unknown reason                           | 3                                 | 1 <sup>a</sup>              | 2                                      | 96                           |
| <b>Neither device passed during the first laryngoscope insertion</b>   |                 |                                                 |                                          |                                   |                             |                                        |                              |
| Patient 16                                                             | Tube + stylet   | Neither                                         | Poor glottic view                        | 2                                 | 2                           | 1                                      | 88                           |
| Patient 17                                                             | Tube + stylet   | Neither                                         | Poor glottic view                        | 2                                 | 0                           | 1                                      | 84                           |
| Patient 18                                                             | Tube + stylet   | Neither                                         | Malfunction of video laryngoscope        | 2                                 | 0                           | 1                                      | 72                           |
| Patient 19                                                             | Bougie          | Neither (used rigid stylet and tube instead)    | Switched to hyperangulated blade         | 1                                 | 0                           | 1                                      | 35                           |
| Patient 20                                                             | Bougie          | Neither                                         | Poor glottic view                        | 2                                 | 1                           | 1                                      | 100                          |
| Patient 21                                                             | Bougie          | Neither                                         | Poor glottic view                        | 2                                 | 0                           | 1                                      | 100                          |
| Patient 22                                                             | Bougie          | Neither                                         | Poor glottic view                        | 2                                 | 0                           | 1                                      | 96                           |
| Patient 23                                                             | Bougie          | Neither                                         | Poor glottic view                        | 2                                 | 1                           | 1                                      | 78                           |

a. Bougie used for rescue after intubation with the endotracheal tube with stylet was not successful.

**eTable 9. Multivariable models for successful intubation on the first attempt.**

| <b>Variable</b>                           | <b>Odds ratio</b> | <b>95% Confidence interval</b> |
|-------------------------------------------|-------------------|--------------------------------|
| Bougie group : Stylet group               | 0.88              | 0.64 to 1.22                   |
| Age (years)                               | 1.14              | 0.99 to 1.32                   |
| Female sex                                | 1.16              | 0.83 to 1.62                   |
| Ethnicity                                 |                   |                                |
| Black, non-Hispanic                       | 0.89              | 0.61 to 1.29                   |
| Hispanic                                  | 1.43              | 0.77 to 2.67                   |
| Other                                     | 1.67              | 0.77 to 3.59                   |
| Body-mass index (kg/m <sup>2</sup> )      | 1.00              | 0.88 to 1.12                   |
| Operator's number of previous intubations | 1.14              | 1.05 to 1.24                   |
| ICU : ED                                  | 0.66              | 0.45 to 0.95                   |

This table shows the results of the multivariable model. We fit a generalized linear mixed-effects model using a logit link function with the primary outcome as the dependent variable, operator and study site as random effect, and fixed effects of study group and the variables listed above. Age, BMI, and intubation experience were modeled with a nonlinear relationship to the outcome using restricted cubic splines with 3 knots. The effect estimates were made by comparing the 75th percentile to the 25th percentile.

A second model including use of a video vs direct laryngoscope, presence of  $\geq 1$  difficult airway characteristic (obesity, body fluids obscuring glottic view, cervical immobilization, or facial trauma), and Cormack-Lehane grade 2, 3, or 4 laryngeal view, produced a similar result for the effect of use of a bougie vs use of a stylet on the outcome of successful intubation on the first attempt (OR 0.82; 95% CI 0.59 to 1.14).

**eTable 10. Pre-specified sensitivity analyses.**

| Analysis                                                                                                                                                                                                                                                                                                                       | Sample size | Bougie group                                 | Stylet group   | Absolute difference (95% CI) | P value |
|--------------------------------------------------------------------------------------------------------------------------------------------------------------------------------------------------------------------------------------------------------------------------------------------------------------------------------|-------------|----------------------------------------------|----------------|------------------------------|---------|
|                                                                                                                                                                                                                                                                                                                                |             | No. with success / total no. in analysis (%) |                |                              |         |
| Repeating the primary analysis but excluding intubations performed with a hyperangulated blade.                                                                                                                                                                                                                                | 1099        | 445/553 (80.5)                               | 453/546 (83.0) | -2.5% (-7.2% to 2.3%)        | 0.28    |
| Repeating the primary analysis but considering crossover from the assigned device to the non-assigned device to represent failure to intubate on the first attempt.                                                                                                                                                            | 1102        | 446/556 (80.2)                               | 443/546 (81.1) | -0.9% (-5.8% to 3.9%)        | 0.70    |
| Repeating the primary analysis but including only data on the primary outcome reported by the independent observer and excluding the 20 cases in which data from the independent observer were unavailable and the operator self-report was used to determine whether successful intubation on the first attempt had occurred. | 1082        | 439/545 (80.6)                               | 444/537 (82.7) | -2.1% (-6.9% to 2.7%)        | 0.37    |
| Repeating the primary analysis but excluding cases in which the operator had $\leq 10$ total prior intubations.                                                                                                                                                                                                                | 1011        | 415/505 (82.2)                               | 424/506 (83.8) | -1.6% (-6.4% to 3.2%)        | 0.49    |
| Repeating the primary analysis but excluding cases in which the operator had $\leq 5$ total prior intubations using a bougie.                                                                                                                                                                                                  | 684         | 288/342 (84.2)                               | 293/342 (85.7) | -1.5% (-7.1% to 4.2%)        | 0.59    |
| Repeating the primary analysis with the alternative definition of successful intubation on the first attempt of "intubation with only one insertion of the laryngoscope blade into the mouth".                                                                                                                                 | 1102        | 487/546 (87.6)                               | 484/546 (88.6) | -1.1% (-5.1% to 2.9%)        | 0.59    |

**eTable 11. Post-hoc sensitivity analyses.**

| Analysis                                                                                                                           | Sample size | Bougie group                                 | Stylet group   | Absolute difference (95% CI) | P value |
|------------------------------------------------------------------------------------------------------------------------------------|-------------|----------------------------------------------|----------------|------------------------------|---------|
|                                                                                                                                    |             | No. with success / total no. in analysis (%) |                |                              |         |
| Repeating the primary analysis among patients with body mass index > 40 kg/m <sup>2</sup>                                          | 71          | 26/38 (68.4)                                 | 29/33 (87.9)   | -19.5% (-40.8% to 1.9%)      | 0.05    |
| Repeating the primary analysis, limited to sites with an attending always present at the tracheal intubation procedure.            | 950         | 387/481 (80.5)                               | 392/469 (83.6) | -3.1% (-8.2% to 2.0%)        | 0.21    |
| Repeating the primary analysis, limited to sites with an attending <i>not</i> always present at the tracheal intubation procedure. | 152         | 60/75 (80.0)                                 | 61/77 (79.2)   | 0.8% (-12.8% to 14.4%)       | 0.91    |
| Repeating the primary analysis, limited to ICU intubations performed with a video laryngoscope                                     | 241         | 101/122 (82.8)                               | 101/119 (84.9) | -2.1% (-12.2% to 8.0%)       | 0.66    |
| Repeating the primary analysis, limited to ICU intubations performed with a direct laryngoscope                                    | 176         | 56/84 (66.7)                                 | 68/92 (73.9)   | -7.2% (-21.9% to 7.4%)       | 0.29    |
| Repeating the primary analysis, limited to ED intubations performed with a video laryngoscope                                      | 587         | 255/302 (84.4)                               | 245/285 (86.0) | -1.5% (-7.6% to 4.6%)        | 0.60    |
| Repeating the primary analysis, limited to ED intubations performed with a direct laryngoscope                                     | 98          | 35/48 (72.9)                                 | 39/50 (78.0)   | -5.1% (-24.2% to 14.0%)      | 0.56    |
| Repeating the primary analysis among cases where a resident physician was the operator                                             | 679         | 279/344 (81.1)                               | 285/335 (85.1) | -4.0% (-9.9% to 2.0%)        | 0.17    |
| Repeating the primary analysis among cases where a fellow physician was the operator                                               | 375         | 145/187 (77.5)                               | 147/188 (78.2) | -0.7% (-9.6% to 8.3%)        | 0.88    |

**eTable 12: Additional Subgroup Analyses of the Primary Outcome**

| <b>Subgroup</b>                               | <b>Bougie group</b> | <b>Stylet group</b> | <b>Adjusted odds ratio (95% CI)</b> | <b>P value for interaction</b> |
|-----------------------------------------------|---------------------|---------------------|-------------------------------------|--------------------------------|
| <b>COVID-19 pandemic<sup>a</sup></b>          |                     |                     |                                     |                                |
| Before pandemic                               | 308/380 (81.1)      | 301/366 (82.2)      | 0.98 (0.66 to 1.47)                 | 0.55                           |
| After pandemic                                | 139/176 (79.0)      | 152/180 (84.4)      | 0.79 (0.44 to 1.41)                 |                                |
| <b>Body fluids obscuring the glottic view</b> |                     |                     |                                     |                                |
| No                                            | 418/506 (82.6%)     | 419/490 (85.5%)     | 0.85 (0.59 to 1.23)                 | 0.37                           |
| Yes                                           | 29/50 (58.0%)       | 34/56 (60.7%)       | 1.30 (0.56 to 3.05)                 |                                |

- a. Patients enrolled on or before February 28, 2020, were considered to have been enrolled before the Coronavirus disease 2019 pandemic.

**eTable 13. Additional procedural outcomes.**

| Characteristic                                                            | Bougie group<br>n=556 | Stylet group<br>n=546 | Absolute difference<br>(95% CI) |
|---------------------------------------------------------------------------|-----------------------|-----------------------|---------------------------------|
| <b>Number of total laryngoscope insertions – no. (%)</b>                  |                       |                       |                                 |
| One insertion                                                             | 487 (87.6)            | 484 (88.6)            | -1.1%<br>(-5.1% to 2.9%)        |
| Two insertions                                                            | 61 (11.0)             | 47 (8.6)              | 2.4%<br>(-1.3% to 6.0%)         |
| Three or more insertions                                                  | 8 (1.4)               | 15 (2.7)              | -1.3%<br>(-3.2% to 0.6%)        |
| <b>Number of total bougie insertions – no. (%)</b>                        |                       |                       |                                 |
| Zero insertions                                                           | 4 (0.7)               | 489 (89.6)            | -88.8%<br>(-91.7% to -86.0%)    |
| One insertion                                                             | 500 (89.9)            | 48 (8.8)              | 81.1%<br>(77.5% to 84.8%)       |
| Two insertions                                                            | 40 (7.2)              | 7 (1.3)               | 5.9%<br>(3.4% to 8.4%)          |
| Three or more insertions                                                  | 12 (2.2)              | 2 (0.4)               | 1.8%<br>(0.3% to 3.3%)          |
| <b>Number of total endotracheal tube insertions – no. (%)<sup>a</sup></b> |                       |                       |                                 |
| One insertion                                                             | 528 (95.0)            | 471 (86.3)            | 8.7%<br>(5.1% to 12.3%)         |
| Two insertions                                                            | 26 (4.7)              | 61 (11.2)             | -6.5%<br>(-9.8% to -3.1%)       |
| Three or more insertions                                                  | 2 (0.4)               | 14 (2.6)              | -2.2%<br>(-3.8% to -0.6%)       |
| <b>Video screen viewing – no. (%)</b>                                     |                       |                       |                                 |
| Video screen viewed when a video laryngoscope was used                    | 387/416 (93.0)        | 363/402 (90.3)        | 2.7%<br>(-1.3 to 6.8%)          |
| <b>Other Complications – no. (%)</b>                                      |                       |                       |                                 |
| Bradycardia (heart rate < 40 bpm)                                         | 4 (0.7)               | 2 (0.4)               | 0.4%<br>(-0.7% to 1.4%)         |

a. Endotracheal tube insertions includes either direct insertion of the endotracheal tube with stylet into the trachea or advancement of the endotracheal tube over a bougie that had been placed in the trachea. Patients in the bougie group were more likely to experience multiple insertions of the bougie followed by a single advancement of an endotracheal tube over the bougie whereas patients in the stylet group were more likely to experience multiple attempts to directly insert an endotracheal tube with stylet into the trachea.

**eTable 14. Adverse events.**

| Event number | Severity | Relatedness | Narrative                                                                                                                                                                                                                                                                                                                                                                                                                                                                                                                                                                                                                                                                                                                                                                                                                                                                                                                                                                                                                                                                                  |
|--------------|----------|-------------|--------------------------------------------------------------------------------------------------------------------------------------------------------------------------------------------------------------------------------------------------------------------------------------------------------------------------------------------------------------------------------------------------------------------------------------------------------------------------------------------------------------------------------------------------------------------------------------------------------------------------------------------------------------------------------------------------------------------------------------------------------------------------------------------------------------------------------------------------------------------------------------------------------------------------------------------------------------------------------------------------------------------------------------------------------------------------------------------|
| 1            | Serious  | Not Related | <p>The patient was randomized to the endotracheal tube with stylet. The first attempt was not successful. The second attempt was successful with use of a bougie. After intubation, the patient was hemodynamically stable with a normal oxygen saturation.</p> <p>Fifteen minutes after intubation a Blakemore tube was placed in the esophagus for upper gastrointestinal hemorrhage with inflation of the gastric and esophageal balloons. The patient immediately developed high airway pressures, hypoxemia, hypotension, and was found to have a pneumothorax. Upper gastrointestinal endoscopy revealed an esophageal rupture, which was attributed to Blakemore tube placement and inflation of esophageal balloon.</p> <p>In the operating room, in addition to the esophageal rupture, a tear in the posterior trachea was observed. The patient died the following day.</p> <p>The treating team believed that both the esophageal and tracheal injury were caused by the Blakemore tube, as evidenced by the stability of the patient until the Blakemore tube was placed.</p> |

**eTable 15. Management when intubation did not occur on the first attempt**

| Characteristics                                                                            | Bougie group<br>n=109 | Stylet group<br>n=93 | Absolute difference<br>(95% CI) |
|--------------------------------------------------------------------------------------------|-----------------------|----------------------|---------------------------------|
| <b>Reason for failure on the first attempt at intubation – no. (%)</b>                     |                       |                      |                                 |
| Inadequate view of vocal cords                                                             | 31 (28.4)             | 29 (31.2)            | -2.7% (-16.4% to 10.9%)         |
| Difficulty passing the endotracheal tube                                                   | 17 (15.6)             | 55 (59.1)            | -43.5% (-56.6% to -30.5%)       |
| Difficulty passing the bougie                                                              | 37 (33.9)             | 0                    | 33.9% (24.1% to 43.8%)          |
| Other                                                                                      | 7 (6.4)               | 4 (4.3)              | 2.1% (-5.1% to 9.3%)            |
| Unknown                                                                                    | 17 (15.6)             | 5 (5.4)              | 10.2% (1.0% to 19.4%)           |
| <b>Devices used after failure on the first attempt at intubation<sup>a</sup> – no. (%)</b> |                       |                      |                                 |
| Bougie                                                                                     | 86 (78.9)             | 47 (50.5)            | 28.4% (14.6% to 42.1%)          |
| Endotracheal tube with stylet                                                              | 24 (22.0)             | 48 (51.6)            | -29.6% (-43.4% to -15.8%)       |
| Bronchoscope                                                                               | 1 (0.9)               | 2 (2.2)              | -1.2% (-5.7% to 3.2%)           |

a. Patients could receive more than one device for subsequent attempts



## eReferences

1. Janz DR, Semler MW, Lentz RJ, et al. Randomized Trial of Video Laryngoscopy for Endotracheal Intubation of Critically Ill Adults. *Crit Care Med* 2016;44(11):1980–7.
2. Driver BE, Prekker ME, Klein LR, et al. Effect of Use of a Bougie vs Endotracheal Tube and Stylet on First-Attempt Intubation Success Among Patients With Difficult Airways Undergoing Emergency Intubation: A Randomized Clinical Trial. *JAMA* 2018;319(21):2179–89.
3. Tekwani KL, Watts HF, Sweis RT, Rzechula KH, Kulstad EB. A comparison of the effects of etomidate and midazolam on hospital length of stay in patients with suspected sepsis: a prospective, randomized study. *Ann Emerg Med* 2010;56(5):481–9.
4. Jabre P, Combes X, Lapostolle F, et al. Etomidate versus ketamine for rapid sequence intubation in acutely ill patients: a multicentre randomised controlled trial. *Lancet* 2009;374(9686):293–300.
5. Semler MW, Janz DR, Lentz RJ, et al. Randomized Trial of Apneic Oxygenation during Endotracheal Intubation of the Critically Ill. *Am J Respir Crit Care Med* 2016;193(3):273–80.
6. Janz DR, Semler MW, Joffe AM, et al. A Multicenter Randomized Trial of a Checklist for Endotracheal Intubation of Critically Ill Adults. *Chest* 2018;153(4):816–24.
7. Semler MW, Janz DR, Russell DW, et al. A Multicenter, Randomized Trial of Ramped Position vs Sniffing Position During Endotracheal Intubation of Critically Ill Adults. *Chest* 2017;152(4):712–22.
8. Caputo N, Azan B, Domingues R, et al. Emergency Department use of Apneic Oxygenation Versus Usual Care During Rapid Sequence Intubation: A Randomized Controlled Trial (The ENDAO Trial). *Acad Emerg Med* 2017;24(11):1387–94.
9. Driver B, Semler MW, Self WH, et al. BOugie or stylet in patients UnderGoing Intubation Emergently (BOUGIE): protocol and statistical analysis plan for a randomised clinical trial. *BMJ Open* 2021;11(5):e047790.
