# Supplementary material
Source: PubMed Central journal article supplement (PMC8655668)
Supplement: jama-e2122002-s003.pdf [file jama-e2122002-s003.pdf]

| *Group Name(s): BOUGIE Investigators and the Pragmatic Critical Care Research Group |             |                       |                  |                                                                                                                        |                                          |                                                                                                                                                                                                                  |  |  |  |  |
|-------------------------------------------------------------------------------------|-------------|-----------------------|------------------|------------------------------------------------------------------------------------------------------------------------|------------------------------------------|------------------------------------------------------------------------------------------------------------------------------------------------------------------------------------------------------------------|--|--|--|--|
| *First Name and Middle Initial(s)                                                   | *Last Name  | *Suffix (eg, Jr, III) | Academic Degrees | Institution                                                                                                            | Location (city, state/province, country) | Role or Contribution, eg, chair, principal investigator                                                                                                                                                          |  |  |  |  |
| Christopher S                                                                       | Gray        |                       | RN               | Department of Emergency Medicine, Vanderbilt University Medical Center                                                 | Nashville, TN, USA                       | Conducted study activities to substantially contribute to the acquisition of data for the work; critical revision of the manuscript for important intellectual content; final approval of manuscript publication |  |  |  |  |
| Andrea                                                                              | Fletcher    |                       | RN               | Department of Emergency Medicine, Vanderbilt University Medical Center                                                 | Nashville, TN, USA                       | Conducted study activities to substantially contribute to the acquisition of data for the work; critical revision of the manuscript for important intellectual content; final approval of manuscript publication |  |  |  |  |
| Sally                                                                               | Dye         |                       | RN               | Department of Emergency Medicine, Vanderbilt University Medical Center                                                 | Nashville, TN, USA                       | Conducted study activities to substantially contribute to the acquisition of data for the work; critical revision of the manuscript for important intellectual content; final approval of manuscript publication |  |  |  |  |
| Swati                                                                               | Gulati      |                       | MBBS, MS         | University of Alabama at Birmingham, Department of Medicine, Division of Pulmonary, Allergy and Critical Care Medicine | Birmingham, AL, USA                      | Conducted study activities to substantially contribute to the acquisition of data for the work; critical revision of the manuscript for important intellectual content; final approval of manuscript publication |  |  |  |  |
| Michael C                                                                           | Kurz        |                       | MD, MS           | Department of Emergency Medicine, University of Alabama at Birmingham                                                  | Birmingham, AL, USA                      | Conducted study activities to substantially contribute to the acquisition of data for the work; critical revision of the manuscript for important intellectual content; final approval of manuscript publication |  |  |  |  |
| Carolyn                                                                             | Lyie        |                       | PA-C, MPH        | Department of Emergency Medicine, Denver Health Medical Center                                                         | Denver, CO, USA                          | Conducted study activities to substantially contribute to the acquisition of data for the work; critical revision of the manuscript for important intellectual content; final approval of manuscript publication |  |  |  |  |
| Stephanie                                                                           | Gravitz     |                       | MPH              | Department of Emergency Medicine, Denver Health Medical Center, Denver                                                 | Denver, CO, USA                          | Conducted study activities to substantially contribute to the acquisition of data for the work; critical revision of the manuscript for important intellectual content; final approval of manuscript publication |  |  |  |  |
| Erica LW                                                                            | Rice        |                       | DO               | Department of Emergency Medicine, Wake Forest Baptist Health                                                           | Winston-Salem, NC, USA                   | Conducted study activities to substantially contribute to the acquisition of data for the work; critical revision of the manuscript for important intellectual content; final approval of manuscript publication |  |  |  |  |
| Nahaniel D                                                                          | Westphal    |                       | MD, MS           | Department of Emergency Medicine, Wake Forest Baptist Health                                                           | Winston-Salem, NC, USA                   | Conducted study activities to substantially contribute to the acquisition of data for the work; critical revision of the manuscript for important intellectual content; final approval of manuscript publication |  |  |  |  |
| Itay                                                                                | Benfroy     |                       | MD, PhD          | University of Washington Department of Anesthesiology and Pain Medicine                                                | Seattle, WA, USA                         | Conducted study activities to substantially contribute to the acquisition of data for the work; critical revision of the manuscript for important intellectual content; final approval of manuscript publication |  |  |  |  |
| Jamie                                                                               | Stang       |                       | BS               | Hennepin County Medical Center, Department of Emergency Medicine                                                       | Minneapolis, MN, USA                     | Conducted study activities to substantially contribute to the acquisition of data for the work; critical revision of the manuscript for important intellectual content; final approval of manuscript publication |  |  |  |  |
| Dalvin                                                                              | DeVries     |                       | BS               | Hennepin County Medical Center, Department of Emergency Medicine                                                       | Minneapolis, MN, USA                     | Conducted study activities to substantially contribute to the acquisition of data for the work; critical revision of the manuscript for important intellectual content; final approval of manuscript publication |  |  |  |  |
| Elan                                                                                | Marugol     |                       | BA               | Hennepin County Medical Center, Department of Emergency Medicine                                                       | Minneapolis, MN, USA                     | Conducted study activities to substantially contribute to the acquisition of data for the work; critical revision of the manuscript for important intellectual content; final approval of manuscript publication |  |  |  |  |
| Bradley                                                                             | Lloyd       |                       | RRT-ACC          | Vanderbilt University Medical Center                                                                                   | Nashville, TN, USA                       | Assisted with data acquisition                                                                                                                                                                                   |  |  |  |  |
| Anthony T                                                                           | Defebio     |                       | RRT-ACC          | University of Colorado Hospital, Department of Emergency Medicine                                                      | Aurora, CO, USA                          | Assisted with data acquisition                                                                                                                                                                                   |  |  |  |  |
| Fevziat                                                                             | Murhamet    |                       | RRT-ACC          | University of Colorado Hospital, Department of Emergency Medicine                                                      | Aurora, CO, USA                          | Assisted with data acquisition                                                                                                                                                                                   |  |  |  |  |
| Rohit                                                                               | Mitchel     |                       | RRT              | University of Colorado Hospital, Department of Emergency Medicine                                                      | Aurora, CO, USA                          | Assisted with data acquisition                                                                                                                                                                                   |  |  |  |  |
| Justin N                                                                            | Oeth        |                       | MSN              | University of Colorado Hospital, Department of Emergency Medicine                                                      | Aurora, CO, USA                          | Assisted with data acquisition                                                                                                                                                                                   |  |  |  |  |
| Angela                                                                              | Otoo        |                       | RRT              | University of Colorado Hospital, Department of Emergency Medicine                                                      | Aurora, CO, USA                          | Assisted with data acquisition                                                                                                                                                                                   |  |  |  |  |
| Elizabeth A                                                                         | Farmer      |                       | RRT              | University of Colorado Hospital, Department of Emergency Medicine                                                      | Aurora, CO, USA                          | Assisted with data acquisition                                                                                                                                                                                   |  |  |  |  |
| Dyrene A                                                                            | Dunn        |                       | RRT              | University of Colorado Hospital, Department of Emergency Medicine                                                      | Aurora, CO, USA                          | Assisted with data acquisition                                                                                                                                                                                   |  |  |  |  |
| Coni                                                                                | Withers     |                       | BS               | University of Colorado Hospital, Department of Emergency Medicine                                                      | Aurora, CO, USA                          | Assisted with data acquisition                                                                                                                                                                                   |  |  |  |  |
| Jennifer                                                                            | Friedel     |                       | BS               | University of Colorado Hospital, Department of Emergency Medicine                                                      | Aurora, CO, USA                          | Assisted with data acquisition                                                                                                                                                                                   |  |  |  |  |
| Karina M                                                                            | Nava        |                       | RRT-ACC          | University of Colorado Hospital, Department of Emergency Medicine                                                      | Aurora, CO, USA                          | Assisted with data acquisition                                                                                                                                                                                   |  |  |  |  |
| Anna                                                                                | Aiz-Stamm   |                       | RN               | University of Alabama at Birmingham, Department of Medicine, Division of Pulmonary, Allergy and Critical Care Medicine | Birmingham, AL, USA                      | Assisted with data acquisition                                                                                                                                                                                   |  |  |  |  |
| Christina                                                                           | Reidley     |                       | MD, PhD          | University of Alabama at Birmingham, Department of Medicine, Division of Pulmonary, Allergy and Critical Care Medicine | Birmingham, AL, USA                      | Assisted with data acquisition                                                                                                                                                                                   |  |  |  |  |
| Mary C                                                                              | Boone       |                       | RN               | University of Alabama at Birmingham, Department of Medicine, Division of Pulmonary, Allergy and Critical Care Medicine | Birmingham, AL, USA                      | Assisted with data acquisition                                                                                                                                                                                   |  |  |  |  |
| Joe W                                                                               | Crites III  |                       | MD               | University of Alabama at Birmingham, Department of Medicine, Division of Pulmonary, Allergy and Critical Care Medicine | Birmingham, AL, USA                      | Assisted with data acquisition                                                                                                                                                                                   |  |  |  |  |
| Kristina                                                                            | Collins     |                       | RN               | University of Alabama at Birmingham, Department of Medicine, Division of Pulmonary, Allergy and Critical Care Medicine | Birmingham, AL, USA                      | Assisted with data acquisition                                                                                                                                                                                   |  |  |  |  |
| Abby                                                                                | Diescher    |                       | RN               | University of Alabama at Birmingham, Department of Medicine, Division of Pulmonary, Allergy and Critical Care Medicine | Birmingham, AL, USA                      | Assisted with data acquisition                                                                                                                                                                                   |  |  |  |  |
| Kevin G                                                                             | Dapouza     |                       | MD               | University of Alabama at Birmingham, Department of Medicine, Division of Pulmonary, Allergy and Critical Care Medicine | Birmingham, AL, USA                      | Assisted with data acquisition                                                                                                                                                                                   |  |  |  |  |
| Janna                                                                               | Dunn        |                       | RN               | University of Alabama at Birmingham, Department of Medicine, Division of Pulmonary, Allergy and Critical Care Medicine | Birmingham, AL, USA                      | Assisted with data acquisition                                                                                                                                                                                   |  |  |  |  |
| Stacy                                                                               | Elam        |                       | MD               | University of Alabama at Birmingham, Department of Medicine, Division of Pulmonary, Allergy and Critical Care Medicine | Birmingham, AL, USA                      | Assisted with data acquisition                                                                                                                                                                                   |  |  |  |  |
| Josh                                                                                | Gashday     |                       | MD               | University of Alabama at Birmingham, Department of Medicine, Division of Pulmonary, Allergy and Critical Care Medicine | Birmingham, AL, USA                      | Assisted with data acquisition                                                                                                                                                                                   |  |  |  |  |
| Nicole                                                                              | Harris      |                       | RN               | University of Alabama at Birmingham, Department of Medicine, Division of Pulmonary, Allergy and Critical Care Medicine | Birmingham, AL, USA                      | Assisted with data acquisition                                                                                                                                                                                   |  |  |  |  |
| Savannah                                                                            | Harris      |                       | RN               | University of Alabama at Birmingham, Department of Medicine, Division of Pulmonary, Allergy and Critical Care Medicine | Birmingham, AL, USA                      | Assisted with data acquisition                                                                                                                                                                                   |  |  |  |  |
| Tanner                                                                              | Husall      |                       | MD               | University of Alabama at Birmingham, Department of Medicine, Division of Pulmonary, Allergy and Critical Care Medicine | Birmingham, AL, USA                      | Assisted with data acquisition                                                                                                                                                                                   |  |  |  |  |
| R. Chad                                                                             | Wade        |                       | MD               | University of Alabama at Birmingham, Department of Medicine, Division of Pulmonary, Allergy and Critical Care Medicine | Birmingham, AL, USA                      | Assisted with data acquisition                                                                                                                                                                                   |  |  |  |  |
| Ruthi                                                                               | Joah        |                       | MBBS             | University of Alabama at Birmingham, Department of Medicine, Division of Pulmonary, Allergy and Critical Care Medicine | Birmingham, AL, USA                      | Assisted with data acquisition                                                                                                                                                                                   |  |  |  |  |
| Daniel                                                                              | Kelmenson   |                       | MD               | University of Alabama at Birmingham, Department of Medicine, Division of Pulmonary, Allergy and Critical Care Medicine | Birmingham, AL, USA                      | Assisted with data acquisition                                                                                                                                                                                   |  |  |  |  |
| Anne M                                                                              | Mason       |                       | RN               | University of Alabama at Birmingham, Department of Medicine, Division of Pulmonary, Allergy and Critical Care Medicine | Birmingham, AL, USA                      | Assisted with data acquisition                                                                                                                                                                                   |  |  |  |  |
| Scott R                                                                             | Merriman    |                       | MD               | University of Alabama at Birmingham, Department of Medicine, Division of Pulmonary, Allergy and Critical Care Medicine | Birmingham, AL, USA                      | Assisted with data acquisition                                                                                                                                                                                   |  |  |  |  |
| Talagudwa                                                                           | Mikozombodo |                       | MD               | University of Alabama at Birmingham, Department of Medicine, Division of Pulmonary, Allergy and Critical Care Medicine | Birmingham, AL, USA                      | Assisted with data acquisition                                                                                                                                                                                   |  |  |  |  |
| Meagan                                                                              | Moore       |                       | RN               | University of Alabama at Birmingham, Department of Medicine, Division of Pulmonary, Allergy and Critical Care Medicine | Birmingham, AL, USA                      | Assisted with data acquisition                                                                                                                                                                                   |  |  |  |  |
| Jada                                                                                | Nowak       |                       | RN               | University of Alabama at Birmingham, Department of Medicine, Division of Pulmonary, Allergy and Critical Care Medicine | Birmingham, AL, USA                      | Assisted with data acquisition                                                                                                                                                                                   |  |  |  |  |
| Kate                                                                                | O'Connor    |                       | DO               | University of Alabama at Birmingham, Department of Medicine, Division of Pulmonary, Allergy and Critical Care Medicine | Birmingham, AL, USA                      | Assisted with data acquisition                                                                                                                                                                                   |  |  |  |  |
| Shevyan D                                                                           | Patel       |                       | MD               | University of Alabama at Birmingham, Department of Medicine, Division of Pulmonary, Allergy and Critical Care Medicine | Birmingham, AL, USA                      | Assisted with data acquisition                                                                                                                                                                                   |  |  |  |  |
| G. Brian                                                                            | Parsons     |                       | MD               | University of Alabama at Birmingham, Department of Medicine, Division of Pulmonary, Allergy and Critical Care Medicine | Birmingham, AL, USA                      | Assisted with data acquisition                                                                                                                                                                                   |  |  |  |  |
| Lisa                                                                                | Saroff      |                       | RN               | University of Alabama at Birmingham, Department of Medicine, Division of Pulmonary, Allergy and Critical Care Medicine | Birmingham, AL, USA                      | Assisted with data acquisition                                                                                                                                                                                   |  |  |  |  |
| Tabitha                                                                             | Stewart     |                       | RN               | University of Alabama at Birmingham, Department of Medicine, Division of Pulmonary, Allergy and Critical Care Medicine | Birmingham, AL, USA                      | Assisted with data acquisition                                                                                                                                                                                   |  |  |  |  |
| William S                                                                           | Stolier     |                       | MD               | University of Alabama at Birmingham, Department of Medicine, Division of Pulmonary, Allergy and Critical Care Medicine | Birmingham, AL, USA                      | Assisted with data acquisition                                                                                                                                                                                   |  |  |  |  |
| Kadambari                                                                           | Vajayumar   |                       | MBBS             | University of Alabama at Birmingham, Department of Medicine, Division of Pulmonary, Allergy and Critical Care Medicine | Birmingham, AL, USA                      | Assisted with data acquisition                                                                                                                                                                                   |  |  |  |  |
| Gina                                                                                | White       |                       | RN               | University of Alabama at Birmingham, Department of Medicine, Division of Pulmonary, Allergy and Critical Care Medicine | Birmingham, AL, USA                      | Assisted with data acquisition                                                                                                                                                                                   |  |  |  |  |
| Stephanie C                                                                         | Demasi      |                       | MD               | Department of Emergency Medicine, University of Alabama at Birmingham                                                  | Birmingham, AL, USA                      | Assisted with data acquisition                                                                                                                                                                                   |  |  |  |  |
| Laura E                                                                             | Goyack      |                       | MD               | Department of Emergency Medicine, University of Alabama at Birmingham                                                  | Birmingham, AL, USA                      | Assisted with data acquisition                                                                                                                                                                                   |  |  |  |  |
| Kristy K                                                                            | Ford        |                       | MD               | Department of Emergency Medicine, Wake Forest Baptist Health                                                           | Winston-Salem, NC, USA                   | Assisted with data acquisition                                                                                                                                                                                   |  |  |  |  |
| Trevor S                                                                            | Mattov      |                       | MD               | Department of Emergency Medicine, Wake Forest Baptist Health                                                           | Winston-Salem, NC, USA                   | Assisted with data acquisition                                                                                                                                                                                   |  |  |  |  |
| Takato                                                                              | Walsh       |                       | MD, MBA          | Department of Emergency Medicine, University of Washington School of Medicine                                          | Seattle, WA, USA                         | Assisted with data acquisition                                                                                                                                                                                   |  |  |  |  |
| Layla                                                                               | Anderson    |                       | BA               | Department of Emergency Medicine, University of Washington School of Medicine                                          | Seattle, WA, USA                         | Assisted with data acquisition                                                                                                                                                                                   |  |  |  |  |
| Abica K                                                                             | Cupelo      |                       | MSW              | Department of Emergency Medicine, Denver Health Medical Center                                                         | Denver, CO, USA                          | Assisted with data acquisition                                                                                                                                                                                   |  |  |  |  |
| Nathan J                                                                            | Lacey       |                       | MD               | Department of Emergency Medicine, Vanderbilt University Medical Center                                                 | Nashville, TN, USA                       | Assisted with data acquisition                                                                                                                                                                                   |  |  |  |  |
