# Supplementary material
Source: PubMed Central journal article supplement (PMC8655668)
Supplement: jama-e2122002-s004.pdf [file jama-e2122002-s004.pdf]

## Supplementary Online Content

Driver BE, Semler MW, Self WH, et al; for the BOUGIE Investigators and the Pragmatic Critical Care Research Group. Effect of use of a bougie vs endotracheal tube with stylet on successful intubation on the first attempt among critically ill patients undergoing tracheal intubation: a randomized clinical trial. *JAMA*. doi:10.1001/jama.2021.22002

### Data Sharing Statement

#### Data

**Data available:** Yes

**Data types:** Deidentified participant data

**How to access data:** These data can be accessed by emailing [jonathan.d.casey@vumc.org](mailto:jonathan.d.casey@vumc.org).

**When available:** beginning date: 10-01-2022, end date: 10-01-2025

### Supporting Documents

**Document types:** None

### Additional Information

**Who can access the data:** Researchers whose proposed use of the data has been approved.

**Types of analyses:** The data will be shared with researchers testing a hypothesis outlined in an institutional review board approved protocol.

**Mechanisms of data availability:** The data are made available without investigator support, after approval of a proposal, and with a signed data access agreement.

**Any additional restrictions:** None
